RESEARCH ARTICLE

# Clarifying the taxonomic status of the alien species *Branchiomma bairdi* and *Branchiomma boholense* (Annelida: Sabellidae) using molecular and morphological evidence

Michela Del Pasqua<sup>1\*</sup>, Anja Schulze<sup>2</sup>, María Ana Tovar-Hernández<sup>3</sup>, Erica Keppel<sup>4</sup>, Marco Lezzi<sup>5</sup>, Maria Cristina Gambi<sup>6</sup>, Adriana Giangrande<sup>1,7</sup>

**1** Department of Biological and Environmental Sciences and Technologies (DiSTeBA), University of Salento, CoNISMa Unit, Lecce, Italy, **2** Department of Marine Biology, Texas A&M University at Galveston, Galveston, Texas, United States of America, **3** Universidad Autónoma de Nuevo León, Facultad de Ciencias Biológicas, Laboratorio de Biosistemática, San Nicolás de los Garza, Nuevo León, México, **4** Smithsonian Environmental Research Center, Edgewater, Maryland, United States of America, **5** ARPAT, Environmental Protection Agency of Tuscany, A.V. Costa - Laboratory Sector - U.O. Biologia, Pisa, Italy, **6** Stazione Zoologica Anton Dohrn di Napoli, Department of Integrative Marine Ecology, Villa Dohrn- Benthic Ecology Center, Punta S. Pietro, Ischia (Napoli), Italy, **7** Stazione Zoologica Anton Dohrn di Napoli, Villa Comunale, Naples, Italy

\* [michela.delpasqua@unisalento.it](mailto:michela.delpasqua@unisalento.it)

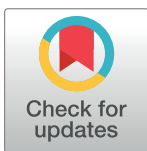

**OPEN ACCESS**

**Citation:** Del Pasqua M, Schulze A, Tovar-Hernández MA, Keppel E, Lezzi M, Gambi MC, et al. (2018) Clarifying the taxonomic status of the alien species *Branchiomma bairdi* and *Branchiomma boholense* (Annelida: Sabellidae) using molecular and morphological evidence. PLoS ONE 13(5): e0197104. <https://doi.org/10.1371/journal.pone.0197104>

**Editor:** Arnar Pálsson, University of Iceland, ICELAND

**Received:** November 11, 2017

**Accepted:** April 26, 2018

**Published:** May 10, 2018

**Copyright:** © 2018 Del Pasqua et al. This is an open access article distributed under the terms of the [Creative Commons Attribution License](https://creativecommons.org/licenses/by/4.0/), which permits unrestricted use, distribution, and reproduction in any medium, provided the original author and source are credited.

**Data Availability Statement:** All relevant data are within the paper and its Supporting Information files.

**Funding:** This work was supported by National Science Foundation Grant DEB-1036186, Dr Anja Schulze. The funders had no role in study design, data collection and analysis, decision to publish, or preparation of the manuscript.

## Abstract

This study was performed to analyse the genetic and morphological diversity of the sabellid annelid genus *Branchiomma*, with special emphasis on a taxon so far identified as *Branchiomma bairdi*. This species, originally described from Bermuda, has frequently been reported as an invader in the Mediterranean, the Atlantic and the Eastern Pacific, but recent observations have raised some taxonomic questions. Samples of this taxon were collected from five sites in the Mediterranean Sea, two sites in the original distribution area of *B. bairdi* in the Gulf of Mexico and four localities in the east Pacific and Atlantic Oceans where *B. bairdi* has been reported as invasive. The molecular results revealed a conspicuous genetic divergence (18.5% K2P) between the sampled Mediterranean populations and all the other ones that led to a re-evaluation of their morphological characters. The latter showed that the Mediterranean and extra-Mediterranean populations also differ in some discrete morphological and reproductive features. Consequently, the Mediterranean samples were re-designated as *B. boholense*, another non-indigenous species originally described from Philippines. *Branchiomma bairdi* and *B. boholense* differ in body size, development and shape of micro and macrostylodes, size of radiolar eyes and body pigmentation. Genetic diversity was high in *B. boholense* from the Mediterranean as well as in *B. bairdi* from the Gulf of Mexico, but low in *B. bairdi* populations outside their native range. The phylogenetic analysis revealed the presence of connections between the Mediterranean localities as well as between native and introduced *B. bairdi* populations that focus the attention on the Panama Canal as important passage for the introduction of the species from the Gulf of Mexico to the north-east Pacific Ocean.

**Competing interests:** The authors have declared that no competing interests exist.

## Introduction

Introductions of marine non-indigenous species (NIS) have occurred for centuries, but in the last decades the increasing maritime traffic and aquaculture activities have favoured the spread of marine species, with irreversible and devastating impact on global biodiversity [1–7]. Under this framework, biological invasions are becoming an increasingly more pressing problem. In the past decades, monitoring and biosecurity programs have been promoted both to assess the spread and abundance of NIS in a given region and to prevent and manage new invasions [8–12]. In order to achieve these purposes, a better knowledge of both the invasion process, the status and biology of the introduced species are needed. This is particularly crucial in regions with a high number of alien species such as the Mediterranean Sea that it is highly susceptible to marine bioinvasion. Recent studies [13–15] have focused the attention on the great number of alien polychaete species reported in this basin (134) whose introduction has been mainly facilitated by the enlargement of the Suez Canal and the steady increasing maritime traffic. The Mediterranean area accounted the highest number of established and invasive polychaete taxa in the world's ocean, suggesting the need of further investigations in this area of knowledge for exhaustive regulatory programs.

Among polychaetes annelids, some species of the Sabellidae family associated with fouling communities are often considered invasive [14,16,17], especially those belonging to the genus *Branchiommma* Kölliker, 1858. Several species in this genus have been reported outside of their natural expected distribution ranges [18]. At present, the genus *Branchiommma* includes approximately 29 recognized species, most of which with an inter-tropical distribution [17,19]. Among these species, six are reported as alien worldwide [14,17,20]: *B. bairdi* (McIntosh, 1885), *B. boholense* (Grube, 1878), *B. curtum* (Ehlers, 1901), *B. lucullanum* (Delle Chiaje, 1828), *B. luctuosum* (Grube, 1870) and *B. conspersum* (Ehlers, 1887). Three of these species have been reported also in the Mediterranean area: *B. bairdi*, *B. luctuosum*, and *B. boholense* [14,21,22] and since their spread in the Mediterranean the biological and ecological characteristic of these species have been deeply investigated [23–30].

*Branchiommma luctuosum*, originally described from the Red Sea, was introduced in the Mediterranean in the late 1970's [21] and it is now a common invasive species in both Eastern and Western basins [21,31–36]. By contrast, *B. boholense*, native to the Indo-Pacific and introduced in the Mediterranean in 1927 [22], seems to be a rare species in the Mediterranean. It was firstly reported in the basin by Knight-Jones et al. [22], who corrected material previously identified as *B. lucullanum*, and it was later recorded in Cyprus [34] and in South East Spain [37]. However, both these more recent findings have been later corrected and the collected specimens were considered belonging to the species *B. bairdi* [25,38]. After this re-identification, all the further records within the Mediterranean basin were referred to as *B. bairdi*.

*Branchiommma bairdi*, originally described for Bermuda [39], represents the most recent *Branchiommma* species introduced in the Mediterranean [14,34] and at present, it is considered the most invasive species of this genus along the Italian coasts [25,27]. *Branchiommma bairdi* has been collected in other Mediterranean areas: Tunisian coasts [40], Balearic sea [41] and Malta [26]. Moreover, the species has been also introduced in several places around the world: Canary and Madeira islands [26,42], Gulf of California (Mazatlán) [43–47], south Mexican Pacific [48] and Australia (Cairns and Lizard Island) [18,49].

All current findings of *B. bairdi* in the Mediterranean suggest an introduction through the Strait of Gibraltar, although the first record for the Mediterranean concerns the oriental basin (as *B. boholense*) [40]. Nevertheless, pathways and times of introductions for *B. bairdi* in the Mediterranean as well as in the other areas around the world, are still uncertain and only a focused phylogeographic (genetic) analysis may clarify this point [26, 42].

In this regard, in the last decades, molecular tools have been proven particularly useful to improve our understanding of the causes and consequences of biological invasion [50–55]. Genetic methods offer the possibility to gain insights into many aspects of the invasion process, including a better understanding of sources and routes of invasions, the detection of cryptic diversity and the connectivity among native and introduced populations [56–62]. However, despite all the benefits provided by the molecular approach, one of the best ways to fully characterize aquatic invasions is to combine genetic and morphological approaches, as the availability of taxonomic expertise is considered the first crucial issue for dealing with the assessment and management of NIS [11,54,63–67].

This synergistic approach might be particularly useful when the species show high intraspecific phenotypic plasticity or when distinct evolutionary lineages do not show clear morphological diversity as it has been observed for the species of the genus *Branchiommma* [18].

The present study was first designed to investigate pathways of introduction of *B. bairdi* in the Mediterranean Sea as well as in other extra-Mediterranean invaded regions. To this end, specimens of the taxon so far identified as *B. bairdi* were sampled in different Mediterranean and extra-Mediterranean sites, including some localities in the original distribution range of the species and examined via amplification of the mitochondrial cytochrome c oxidase subunit I (COI). However, the molecular results suggested the presence of two different taxa between the sampled Mediterranean and extra-Mediterranean specimens. Therefore, the purpose of this study was reoriented towards a clarification of the taxonomic status of the collected *Branchiommma* species and, consequently, results from molecular analysis were integrated with a thorough morphological examination that was performed on several individuals of each studied population.

## Materials and methods

### Sample collection and preparation

All the examined material was collected on hard bottom in port environments, between 1 and 5 m depth. Samples were collected between the years 2012 and 2017 and each site was only sampled once. Mediterranean specimens were collected in five sites: Mar Grande of Taranto TA (Ionian Sea, Italy); Ischia Island: Lacco Ameno LA, Sant'Anna SA, and Castello Aragonese CA (Tyrrhenian Sea, Italy); and Mar Menor MM (Central Mediterranean Sea, Spain). Extra-Mediterranean specimens were collected in six sites: Madeira MD (North East Atlantic, Portugal); Tampa Bay TB (Gulf of Mexico, Florida,); Veracruz VZ (Gulf of Mexico, Mexico,); Mazatlán MZ (North-East Pacific Ocean, Mexico); Galapagos GAL (North-East Pacific Ocean, Ecuador) and Hawaii HW (North-Central Pacific Ocean, USA) (Fig 1, Table 1). For Mexican material (Veracruz and Mazatlán) the sampling permission was granted by the Comisión Nacional de Acuacultura y Pesca (Authority: Lic. Aldo Gerardo Padilla Pestaño). Tampa Bay material was collected during the fouling project specifically designed to search for non-indigenous species [17,20,68]. The permission was issued by the Smithsonian Environmental Research Center (SERC) in Edgewater, Maryland. This material was part of the SERC reference collection (Authority: Dr. Gregory Ruiz). The permission for samples collection in Galapagos was allowed by the Ministry of Environment of Ecuador (MAE) and by the Galapagos National Park Directorate, while the permit for sampling specimens from Hawaii was granted by Hawaii Department of Land and Natural Resources. Sampling in Madeira island was allowed by the administrator of the Funchal Marina without any specific permission. Specimens collected from Madeira Island in our study are not considered an endangered or protected species. Taranto samples were collected in private land (aquaculture facilities Cantiere Navale Greco) and the permission was granted by the owner Dr. Francesco Grego. Samples

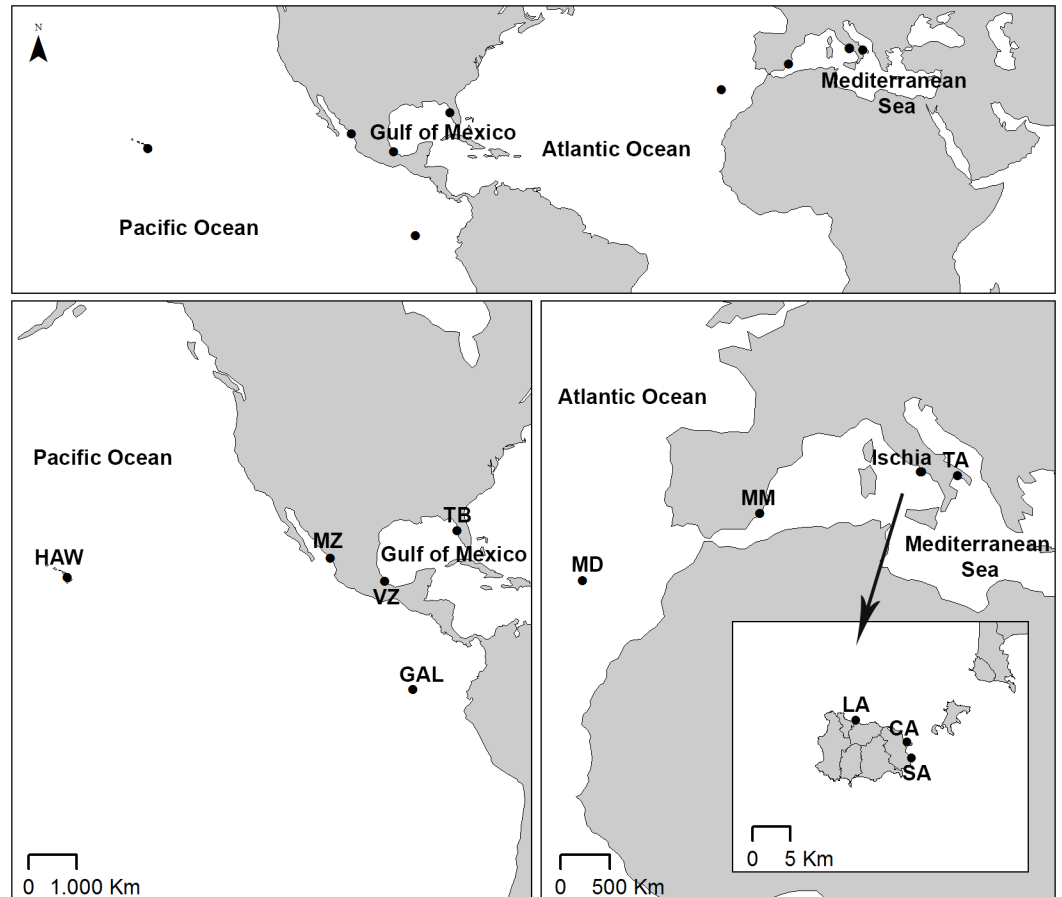

**Fig 1. Geographical map with location of the sampling sites.** For population identification see Table 1.

<https://doi.org/10.1371/journal.pone.0197104.g001>

**Table 1. Geographic coordinates of the 11 sampling sites and estimates of genetic diversity for cytochrome c oxidase subunit I (COI) sequences (493 bp).**

| Sampling site      | Code | Geographic Region/Country        | Latitude/Longitude            | N   | Nh | Np | h             | $\pi$             |
|--------------------|------|----------------------------------|-------------------------------|-----|----|----|---------------|-------------------|
| Taranto            | TAR  | SE Mediterranean Sea/ Italy      | 40°26'34.86"N/ 17°15'2.13"E   | 9   | 5  | 5  | 0.806±0.120   | 0.00297±0.0007    |
| Lacco Ameno        | LA   | NW Mediterranean Sea/ Italy      | 40°45'10.94"N/ 13°53'26.77"E  | 8   | 5  | 9  | 0.857±0.108   | 0.00500±0.00124   |
| Sant'Anna          | SA   | Central Mediterranean Sea/ Italy | 40°43'36.66"N/ 13°57'38.15"E  | 14  | 8  | 9  | 0.824±0.098   | 0.00310±0.00091   |
| Castello Aragonese | CA   | Central Mediterranean Sea/ Italy | 40°43'54.09"N/ 13°57'49.53"E  | 6   | 2  | 3  | 0.333±0.215   | 0.00203±0.00131   |
| Mar Menor          | MM   | Central Mediterranean Sea/ Spain | 37°40'37.39"N/ 0°47'32.93"W   | 11  | 4  | 4  | 0.782±0.075   | 0.00384±0.00038   |
| Madeira            | MD   | East Atlantic Ocean/ Portugal    | 32°38'34.47"N/ 16°54'43.50"W  | 14  | 1  | 0  | 0.000±0.000   | 0.000±0.000       |
| Mazatlán           | MZ   | NE Pacific Ocean/ Mexico         | 23°16'12.14"N/ 106°27'17.25"W | 15  | 1  | 0  | 0.000±0.000   | 0.000±0.000       |
| Galapagos          | GAL  | NE Pacific Ocean/Ecuador         | 0°44'52.04"S/ 90°18'44.98"W   | 20  | 2  | 13 | 0.100±0.088   | 0.00264±0.00232   |
| Hawaii             | HAW  | NC Pacific Ocean/ USA            | 21°22'13.66"N/ 157°56'14.96"W | 2   | 1  | 0  | 0.000±0.000   | 0.000±0.000       |
| Veracruz           | VZ   | Gulf of Mexico/ Mexico           | 19°11'17.52"N/ 96°7'19.26"W   | 11  | 4  | 14 | 0.709±0.099   | 0.01328±0.00159   |
| Tampa Bay          | TB   | Gulf of Mexico/ Florida          | 27°43'25.85"N/ 82°40'57.62"W  | 13  | 6  | 13 | 0.769 ± 0.089 | 0.00557 ± 0.00251 |
| Total              |      |                                  |                               | 123 | 11 | 44 | 0.618 ± 0.035 | 0.07322 ± 0.00293 |

Each sampling site refers to a different population. Sample size (N), number of haplotypes (Nh), number of polymorphic sites (Np), haplotype (h) and nucleotide ( $\pi$ ) diversity for each studied population and in total.

<https://doi.org/10.1371/journal.pone.0197104.t001>

collection from Ischia island (Lacco Ameno, Sant'Anna, Castello Aragonese) was allowed by the Ministry of the Environment and Protection of Land and Sea of Italy and by the Management Consortium of the Marine Protected Area Regno di Nettuno. The permission for sampling in Mar Menor was granted by Servicio de Pesca de la Consejería de Agricultura y Pesca (Comunidad Autónoma de la Región de Murcia).

Collected worms used for the molecular analysis were preserved in absolute ethanol and stored in the laboratory at  $-20^{\circ}\text{C}$  until processing. Some specimens were fixed in 4% buffered formaldehyde seawater solution and then preserved in 70% ethanol for morphological analysis.

In addition, seven specimens of *B. boholense* [22] from Indonesia (Komodo Island, Sumba and Banda Sea) were morphologically examined and measured for comparative purposes. This material was collected on sandy calcareous bottom from 10 to 90 m depth in 1984 during the Indonesian-Dutch Snellius II Expedition (Zoological Museum of Amsterdam).

### Molecular analysis

DNA extraction was carried out following the procedure used by [18] using tissue removed from the posterior end of the worms. Genomic DNA was extracted using standard protocols for the DNeasy Blood and Tissues Kit (QIAGEN Pty Ltd, Dusseldorf, Germany) and stored at  $-20^{\circ}\text{C}$  until further processing. The primer cocktail designed by [69] was used for the amplification of the COI gene for all the individuals of the Mediterranean populations (MM, TA, LA, SA, CA) and for some specimens collected from the Mazatlán populations (MZ). The amplifications were carried out in a 25  $\mu\text{l}$  reaction containing 1  $\mu\text{l}$  of the genomic DNA, 0.5  $\mu\text{l}$  of HotStartIt Taq DNA polymerase, 1.5  $\mu\text{l}$  of  $\text{MgCl}_2$  (25 mM), 1  $\mu\text{l}$  of dNTPs (50 mM each), 5.5  $\mu\text{l}$  of ddH<sub>2</sub>O, 12.5  $\mu\text{l}$  of 10% trehalose, 2.5  $\mu\text{l}$  of 10X buffer HotStartIt and 0.25  $\mu\text{l}$  of each primer (10 mM). The PCR thermal cycling profile was  $94^{\circ}\text{C}$  for 1 min, 5 cycles of  $94^{\circ}\text{C}$  for 30s,  $45^{\circ}\text{C}$  for 40s,  $72^{\circ}\text{C}$  for 1min followed by 35 amplifications cycles of  $94^{\circ}\text{C}$  for 30s,  $50^{\circ}\text{C}$  for 40s,  $72^{\circ}\text{C}$  for 1min with a final extension step at  $72^{\circ}\text{C}$  for 10 min.

As the PCR using the COI primer cocktail [69] was unsuccessful for the amplification of the populations of Madeira, Veracruz, Galapagos, Tampa Bay and Hawaii, a new set of primers PolyBr\_COIF/PolyBr\_COIR was designed: the forward primer 5' TCWATWAGWGT WATTATTCGKGCTG 3' and the reverse 5' CMGCAGGATYAAARAACCTAGTA 3' . PCR mixture (20  $\mu\text{l}$  in total volume) contained 0.5 of the genomic DNA, 0.08  $\mu\text{l}$  f Platinum Taq DNA polymerase, 0.6  $\mu\text{l}$  of  $\text{MgCl}_2$  (50 mM), 0.4  $\mu\text{l}$  dNTPs (50 mM), 15.42  $\mu\text{l}$  of ddH<sub>2</sub>O, 2  $\mu\text{l}$  of 10X buffer and 0.5  $\mu\text{l}$  of each primer (10 mM). The PCR thermocycler protocol was  $94^{\circ}\text{C}$  for 1 min, 5 cycles at  $94^{\circ}\text{C}$  for 30 s,  $58^{\circ}\text{C}$  for 30 s, and  $72^{\circ}\text{C}$  for 40 s, 30 cycles at  $94^{\circ}\text{C}$  for 30 s,  $55^{\circ}\text{C}$  for 30 s and  $72^{\circ}\text{C}$  for 40 s, final extension at  $72^{\circ}\text{C}$  for 7 min.

PCR products were verified by means of electrophoresis on 1% agarose gel with ethidium bromide. The products of successful amplifications were purified using the ExoSAP-IT PCR purification system (USB Corporation, Cleveland, Ohio, USA) and then bidirectionally sequenced using the forward and reverse primer M13 for the Mediterranean and Mazatlán populations. For the sequencing of the samples collected from all the other populations, the new set of primer was utilized. Cycle sequencing was performed using BigDye Terminator version 3.1 in a 10  $\mu\text{l}$  reaction containing 5  $\mu\text{l}$  of 10% trehalose, 2  $\mu\text{l}$  of 5X BigDye buffer, 1  $\mu\text{l}$  of BigDye, 1  $\mu\text{l}$  of each primer (or primer cocktail) and 1  $\mu\text{l}$  of the PCR products. After clean-up of the sequence reactions using Zymo Sequencing Clean-Up Kit, the sequences were analysed with an ABI PRISM<sup>®</sup> 3130 Genetic Analyzer [<http://dx.doi.org/10.1371/journal.pone.0197104/protocols.io.nx6dfre>]. A total of 123 sequences were generated using either of the two primer combinations (S4 Table).

Forward and reverse sequences were combined and manually edited with Sequencher v. 4.8 (Gene Codes Corporation, Ann Arbor, MI, USA). The sequences were aligned using the algorithm CLUSTAL W implemented in MEGA 5 [70] and trimmed to a uniform length of 493 bp.

The levels of genetic polymorphism for each studied population were estimated by the number of haplotypes (Nh), haplotype diversity (h) and nucleotide diversity ( $\pi$ ) using DNASP 5.10.01 [71].

Pair-wise  $F_{ST}$  among all populations was calculated using ARLEQUIN v. 3.5.2.2 [72]. The significance of the variance components and pairwise  $\Phi_{ST}$  values were assessed by a permutation test with 10,000 replicates. The average sequence divergence between inferred clades was estimated using the Kimura two-parameter (K2P) model as implemented in MEGA 5 [70]. The genetic relationships among haplotypes were analyzed by a median-joining (MJ) network using the software PopART [73]. A Bayesian consensus tree was constructed with the software MrBayes v. 3.2.6 [74] using the General Time Reversible (GTR) model of evolution with gamma distributed rate variation among sites, which was selected as the optimal substitution model of sequence evolution by using the Bayesian information criterion (BIC) implemented in jModelTest 2.1.20 [75]. The Bayesian tree was estimated after 2 million generations sampled every 1000 generations. Sequences from *Bispira manicata* (Grube, 1878) [76], *Bispira serrata* Capa, 2007 [76], *Branchiomma* sp. [77] and *B. bairdi* [78] were used as outgroup (GenBank<sup>®</sup> KX894904.1; KX894907.1; EU835657.1; HQ015126.1; KP254646.1). *Branchiomma* sp. sequences belong to specimens collected in Australia (Darwin Harbor) and Hawaii (Kaneohe Bay, Oahu) [77], while *B. bairdi* was collected in Florida [78].

## Morphological analysis

For this study, detailed observations of the external morphology of specimens collected from different localities were undertaken using light microscopy. For each locality, 15 adult individuals were examined and for all the specimens, the total body length (including radiolar crown, thorax and abdominal regions), the trunk length (only thorax and abdominal areas) and the radiolar crown lengths were measured. Moreover, some morphological features such as length of radiolar tips, shape of stylodes, dorsal lips and number of rows of teeth above the main fang of thoracic and abdominal uncini were analysed. The number of thoracic and abdominal chaetigers and the ratio of crown-trunk lengths were also measured.

All the analysed morphological features were photographed using a digital camera attached to the stereo- and compound microscopes (Nikon, Coolpix 990 and Carl Zeiss AxioCam Erc 5s, Zen 2012, Carl Zeiss Microscopy GmbH, Jena, Germany). Thoracic uncini were drawn with the aid of a camera lucida. Due to the variation in size and morphology of uncini along the body segments and within the tori, their morphology was analysed considering the dorsal most uncini of second thoracic chaetiger.

A one-way analysis of variance (ANOVA) was performed by using STATSOFT STATISTICA v. 6.0 to test for significant differences in the mean value of the crown/trunk length ratio between Mediterranean and extra-Mediterranean samples. Pearson correlation analysis was carried out on the number of chaetigers and the values of body length in order to evaluate the relationship between the two measurements taken.

## Results

### Genetic analysis

The sequencing of the 493 base pair fragment of the COI gene in 123 individuals identified 11 haplotypes. These haplotypes derived from 44 polymorphic sites of which 43 were parsimony

informative. Most polymorphisms were the results of synonymous changes (43 of the 44 sites) while five mutations produced amino acid replacements (non-synonymous changes). Seven of the 11 identified haplotypes were location private, six of which were represented by a single individual. Four haplotypes were shared by individuals collected from distinct populations and sampling sites, two of which resulted the most common haplotypes: haplotype 1 was present just in the Mediterranean Sea and was shared by 35 individuals belonging to all the sampled Mediterranean populations, while haplotype 9 was shared by 67 individuals collected from different populations in both the Pacific Ocean, the Gulf of Mexico and the Atlantic Ocean (S1 Table).

Haplotype ( $h$ ) and nucleotide ( $\pi$ ) diversity were quite different within populations (Table 1). Haplotype diversity was high in most of the Mediterranean populations (mean  $h \pm$  standard deviation =  $0.806 \pm 0.218$ ), while samples from Madeira, Mazatlán, Galapagos and Hawaii populations showed low values of haplotype diversity ranging from  $0.000 \pm 0.000$  to  $0.100 \pm 0.088$ . Similarly, the mean nucleotide diversity of the Mediterranean samples was high ( $0.0031 \pm 0.001$ ), while Mazatlán, Madeira and Hawaii populations showed minimum values of nucleotide diversity, ranging from  $0.000 \pm 0.000$  to  $0.00155 \pm 0.00067$ , highlighting the higher genetic diversity observed in the Mediterranean samples. By contrast, the maximum values of nucleotide diversity were detected in Veracruz populations with  $h = 0.01328 \pm 0.00159$  (Table 1).

Values of pairwise  $\Phi_{ST}$  and average K2P genetic distance analysis evidenced a great molecular divergence between the Mediterranean populations and those sampled both in the Gulf of Mexico, Atlantic Ocean and Pacific Ocean (S2 and S3 Tables). Indeed, all the comparison between the sampled Mediterranean populations and the Pacific, Mexican and Atlantic ones showed high and significant pairwise  $\Phi_{ST}$  values, ranging from 0.93957 to 0.99684. By contrast, low and non-significant genetic divergence was observed in all the comparisons among the Mediterranean populations, as well as between the Pacific populations and the Atlantic ones, including populations from the Gulf of Mexico. Moreover, no molecular differentiation was observed in all the comparisons between Madeira, Mazatlán, Hawaii and Tampa Bay populations, while slightly higher values were obtained for the comparisons between Veracruz population and Madeira, Mazatlán, Hawaii, Galapagos and Tampa Bay (S2 Table). Comparably, values of the average Kimura two-parameter distance calculated between the different populations, evidenced a strong genetic variation ( $18.5\% \pm 0.000614$ ) between the Mediterranean populations compared to all the other ones, while comparisons between the Mediterranean populations as well those independently calculated within the Pacific, Mexican and Atlantic group of populations showed no significant average genetic distance (S3 Table).

The phylogenetic tree constructed using the Bayesian approach evidenced two distinct monophyletic groups of samples (posterior probability, pp. 1.00) (Fig 2). Group 1 was well supported (pp. 1.00) and enclosed samples belonging to populations collected in the Gulf of Mexico, Pacific Ocean and Atlantic Ocean. On the other hand, Group 2 comprised exclusively COI sequences obtained from individuals collected in the Mediterranean basin (pp. 1.00). The COI sequence identified as *Branchiommma bairdi* [78] and used as outgroup did not cluster inside the studied clades of samples, probably because it refers to another *Branchiommma* species.

The MJ network of haplotype showed results highly concordant with the phylogenetic analysis. The analysis distinguished two groups of haplotypes, separated by 33 mutations (Fig 3). Haplogroup 1 included three haplotypes (Hap\_9, Hap\_10, Hap\_11), of which one (Hap\_9) was shared by the 89% of the individuals sampled from different populations in both the Gulf of Mexico, Pacific and Atlantic areas. Haplotype 10 was present in seven individuals sampled from Veracruz, Galapagos and Tampa Bay populations, while haplotype 11 was represented by

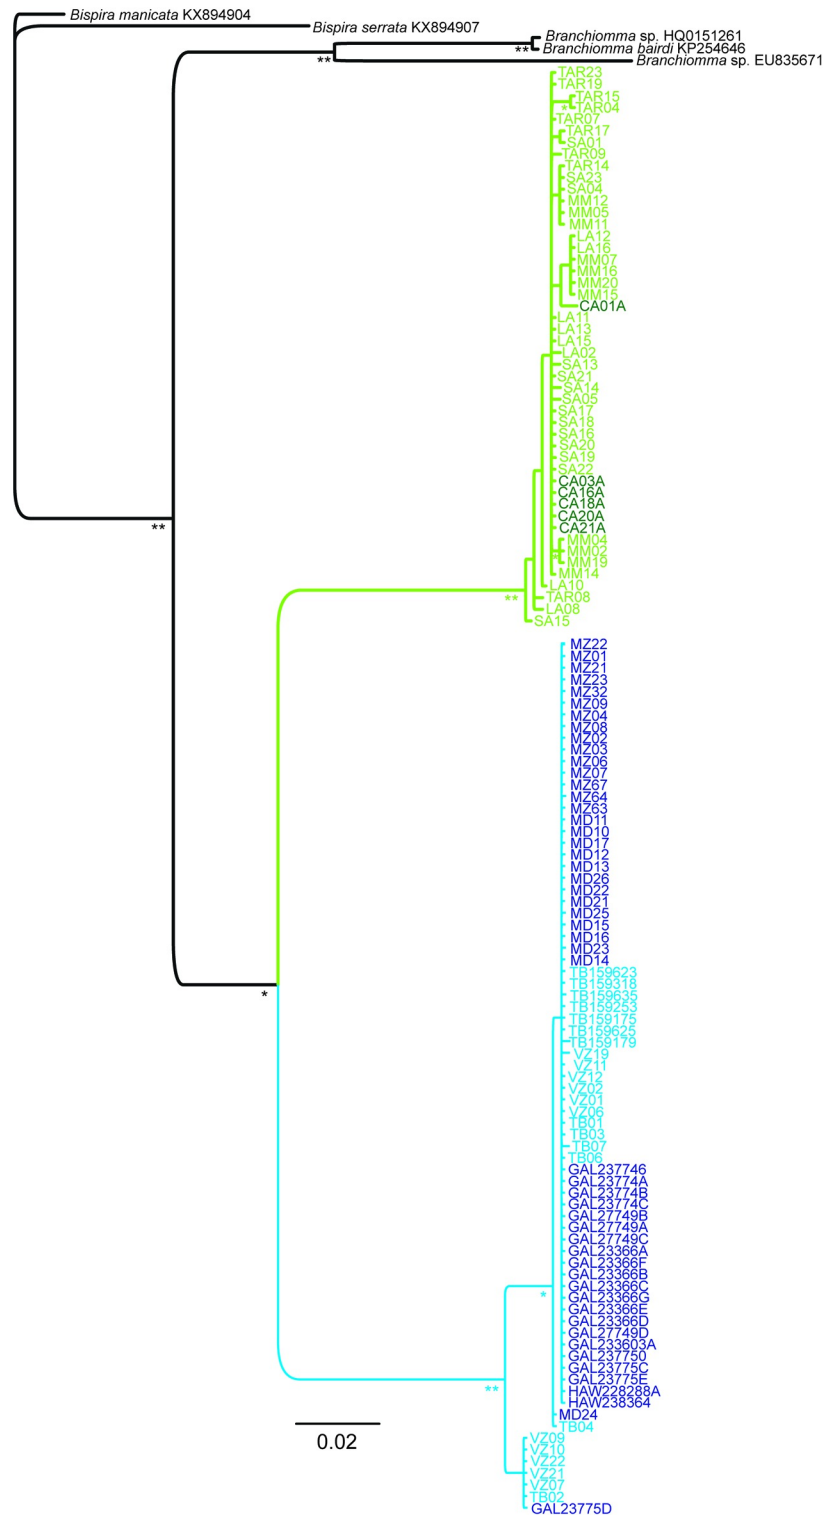

**Fig 2. Bayesian phylogenetic tree of the 124 COI *Branchiommma* sequences obtained (marked in blue and green).** OTUs names consist of the abbreviated location name according to Table 1 and a unique identifier. For Mediterranean populations, dark green indicates samples collected from carbon dioxide vents, light green samples from non-acidified sites. For extra-Mediterranean populations, dark blue indicates samples from sites where the species was introduced, light blue indicates samples from the native range. The tree was rooted using sequences of *Bispira manicata*, *Bispira serrata*, *Branchiommma sp.* and *Branchiommma bairdi* as outgroups (taxon names followed by GenBank<sup>®</sup> accession



numbers). Only nodes supported by posterior probabilities  $\geq 0.95$  are reported. \*\*, posterior probability = 1; \*, posterior probability  $\geq 0.95$  and  $< 1$ .

<https://doi.org/10.1371/journal.pone.0197104.g002>

a single individual and was location private. Haplogroup 2 contained eight haplotypes exclusively present in the Mediterranean basin. Haplotype 1 resulted the most frequent haplotype inside the basin, as it was shared by 35 individuals belonging to all the sampled Mediterranean populations. Haplotype 6 differentiated from haplotype 1 by one mutation and was present in four individuals, two sampled in the locality of Lacco Ameno and two belonging to Mar Menor population. Haplotype 2 was present just in the Taranto population while all the other haplotypes were location private and represented by a single individual (Fig 3, S1 Table).

### Morphological analysis

The two groups of populations that molecular analysis showed to be genetically divergent, also showed slight morphological differences. As shown in Table 2, one of the main differences

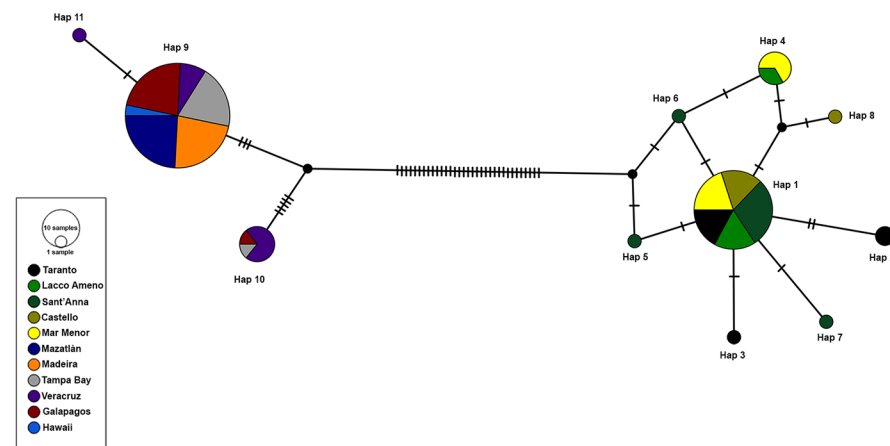

**Fig 3. Median-joining network of haplotypes detected from the 11 studied localities.** The area of each circle is proportional to the number of individuals exhibiting that haplotype (Hap). Each line joining haplotypes represents one mutational step, transversal bars show additional steps.

<https://doi.org/10.1371/journal.pone.0197104.g003>

**Table 2. Mean values of total body length, trunk length, crown length and crown/trunk length ratio for each Mediterranean and extra-Mediterranean studied localities.**

|                    | Mean total body size (cm) | Mean trunk length (cm) | Mean crown length (cm) | Mean CL/TL (cm)    |
|--------------------|---------------------------|------------------------|------------------------|--------------------|
| Taranto            | 3.80 ± 0.83               | 2.60 ± 0.68            | 1.30 ± 0.25            | 0.52 ± 0.20        |
| Sant'Anna          | 3.00 ± 0.70               | 1.70 ± 0.56            | 1.30 ± 0.21            | 0.66 ± 0.14        |
| Lacco Ameno        | 3.20 ± 0.61               | 2.00 ± 0.39            | 1.20 ± 0.22            | 0.61 ± 0.08        |
| Castello Aragonese | 3.10 ± 0.72               | 2.00 ± 0.57            | 1.20 ± 0.25            | 0.58 ± 0.12        |
| Mar Menor          | 3.70 ± 0.69               | 2.30 ± 0.56            | 1.40 ± 0.17            | 0.64 ± 0.14        |
| <b>Total</b>       | <b>3.30 ± 0.77</b>        | <b>2.00 ± 0.63</b>     | <b>1.30 ± 0.21</b>     | <b>0.60 ± 0.14</b> |
| Mazatlán           | 1.70 ± 0.51               | 1.00 ± 0.41            | 0.60 ± 0.13            | 0.44 ± 0.11        |
| Tampa Bay          | 1.80 ± 0.61               | 1.30 ± 0.56            | 0.50 ± 0.10            | 0.41 ± 0.15        |
| Veracruz           | 2.10 ± 0.48               | 1.30 ± 0.38            | 0.60 ± 0.18            | 0.46 ± 0.17        |
| Galapagos          | 2.00 ± 0.51               | 1.40 ± 0.41            | 0.50 ± 0.13            | 0.40 ± 0.10        |
| Hawaii             | 1.30 ± 0.29               | 0.90 ± 0.24            | 0.40 ± 0.11            | 0.54 ± 0.18        |
| Madeira            | 2.40 ± 0.60               | 1.70 ± 0.52            | 0.70 ± 0.17            | 0.36 ± 0.14        |
| <b>Total</b>       | <b>1.85 ± 0.60</b>        | <b>1.25 ± 0.50</b>     | <b>0.50 ± 0.16</b>     | <b>0.42 ± 0.15</b> |

<https://doi.org/10.1371/journal.pone.0197104.t002>

**Table 3. Results of the ANOVA analysis testing for differences in average crown/trunk length ratio measured in Mediterranean and extra-Mediterranean samples.**

| Source of variation                  | Df | MS       | F       | p               |
|--------------------------------------|----|----------|---------|-----------------|
| Mediterranean vs extra-Mediterranean | 1  | 49.43971 | 289.305 | < <b>0.0001</b> |

Df: degrees of freedom, MS: mean square, F: F-statistics, p: P-values. Significant p values are in bold.

<https://doi.org/10.1371/journal.pone.0197104.t003>

concerns body size. Individuals from Mediterranean populations showed higher values of total body length (mean total length  $\pm$  standard deviation =  $3.3 \pm 0.7$  cm) than extra-Mediterranean specimens ( $1.85 \pm 0.6$  cm). Likewise, Mediterranean specimens had higher values of trunk length (mean trunk length  $\pm$  standard deviation =  $2 \pm 0.6$  cm) and crown length (mean crown length  $\pm$  standard deviation =  $1.3 \pm 0.2$  cm) than extra-Mediterranean ones ( $1.25 \pm 0.5$  cm,  $0.5 \pm 0.1$  cm). Specimens from Indonesia showed intermediate values of total body length ( $2.44 \pm 0.7$  cm), trunk length ( $1.66 \pm 0.6$  cm) and crown length ( $0.77 \pm 0.12$  cm) between Mediterranean and extra Mediterranean populations.

Moreover, significant differences ( $p < 0.0001$ ) were detected in the values of crown/trunk length ratio between Mediterranean and non-Mediterranean samples (Table 3). The values of crown/trunk length ratio resulted higher in Mediterranean populations than in extra-Mediterranean samples (Fig 4). Results from Pearson correlation analysis evidenced a linear relationship between body size of the worms and the number of chaetigers both in Mediterranean (Fig 5A) and extra-Mediterranean samples (Fig 5B).

The morphological features of Mediterranean and extra-Mediterranean specimens are listed in Table 4. Individuals from Mediterranean material showed a brownish colouration with small dark spots both in preserved and live specimens (Fig 6A). Their radiolar crown showed to bear from 20 to 25 radioles with short radiolar tips (as long as equivalent space of 6–8 pinnules), in some specimens abruptly tapering with pinnules extending up to the radiolar tips (Fig 7B). Dorsal lips were as long as 1/3 of the crown (Fig 7E). Microstylodes appeared

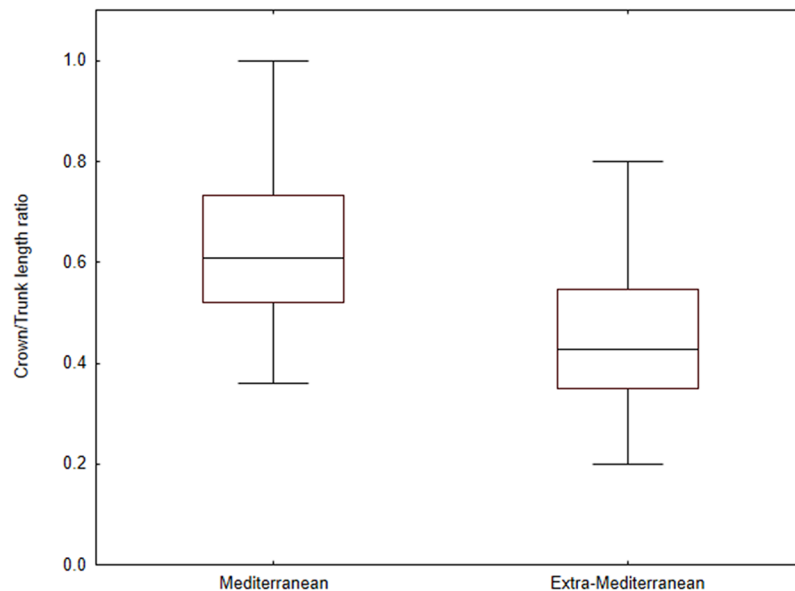

**Fig 4. Box-plot graph of the ANOVA results.** The graph shows the values of crown/trunk length ratio reported for Mediterranean and extra-Mediterranean specimens. Differences in these values were tested using crown/trunk length ratio as dependent variable and the geographical origin of the samples (Mediterranean, extra-Mediterranean) as factor.

<https://doi.org/10.1371/journal.pone.0197104.g004>

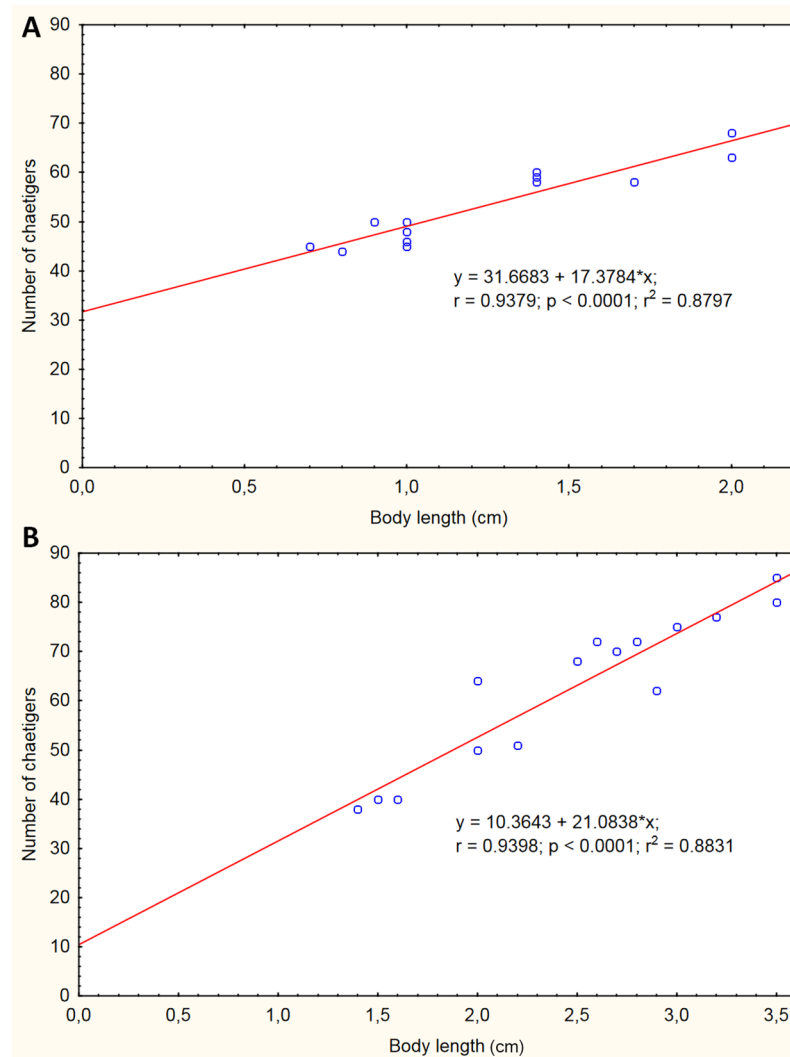

**Fig 5. Relationship among biometrical measurement in the studied *Branchiomma* samples.** The graphs show the correlation between individuals' total body size and number of chaetigers for Mediterranean and extra-Mediterranean populations. (A) Trunk length-number of chaetigers relationship for Mediterranean samples (Taranto population). (B) Trunk length-number of chaetigers relationship for extra-Mediterranean samples (Mazatlán).

<https://doi.org/10.1371/journal.pone.0197104.g005>

digitiform in all the examined individuals, small, as long as rachis width or slightly longer (Figs 7A, 7C and 8A, 8B) and not covering the radiolar eyes that appeared small (covering less than 1/2 of side of radiolar rachis at mid-radiolar length) along the radiole and brownish coloured (Figs 7A, 7C and 8A, 8B). Flattened, tongue-like macrostylodes, 2–3 times longer than microstylodes, were present in number of 1–4 pairs per radiole (Figs 7A, 7C and 8A, 8B). However, high variability in the morphology of macrostylodes was observed according to the position of the radiole within the radiolar crown, indeed, some macrostylodes appeared strap-like (cylindrical). Variation was also viewed in tips of macrostylodes, sometimes being distally rounded others being acuminate (Fig 8A and 8B). The basal microstylodes appeared small (as long as rachis width or slightly longer) and unpaired (Fig 6B). Thoracic and abdominal uncini with 1–2 rows of teeth over the main fang (Fig 7D and 7F).

**Table 4. Morphological features of Mediterranean (*B. boholense*) and extra-Mediterranean (*B. bairdi*) specimens.**

| Morphological features                                | Mediterranean taxon (presumably <i>B. boholense</i> )                                      | Extra-Mediterranean taxon ( <i>B. bairdi</i> )                              |
|-------------------------------------------------------|--------------------------------------------------------------------------------------------|-----------------------------------------------------------------------------|
| numbers of radioles                                   | 20–25 pairs                                                                                | 15–18 pairs                                                                 |
| basal stylodes                                        | small (as long as rachis width or slightly longer), unpaired                               | long (notoriously longer than rachis width), unpaired                       |
| shape of macrostylodes                                | flattened, tongue-like mainly but strap-like may be present                                | cylindrical, strap-like                                                     |
| shape and size of microstylodes                       | short (as long as rachis width or slightly longer), digitiform                             | long (notoriously longer than rachis width), digitiform                     |
| compound eyes                                         | small (covering less than 1/2 of side of radiolar rachis at mid-radiolar length) /brownish | big (covering 3/4 of side of radiolar rachis at mid-radiolar length)/orange |
| radiolar tips                                         | short (as long as equivalent space of 6–8 pinnules), tapering                              | long (occupying the space of 10–15 pinnules)                                |
| dorsal lips                                           | 1/3 of the crown                                                                           | 1/3 of the crown                                                            |
| body pigmentation                                     | dark brownish with small dark spots (preserved and alive)                                  | yellow-green (alive)/brownish (preserved) with small brownish spots         |
| body size                                             | Medium (2–2.5 cm), large-sized (superior to 3 cm)                                          | Small (1–1.9 cm), medium-sized (2–2.5 cm)                                   |
| number of teeth over the main fang of thoracic uncini | 1–2                                                                                        | 2–3                                                                         |

<https://doi.org/10.1371/journal.pone.0197104.t004>

Specimens from all the extra-Mediterranean material showed a green (in alive specimens) and brownish colouration (in fixed specimens) with interramal small brownish spots along the body and an orange-red pigmented crown in some specimens (Fig 6A). Their radiolar crown showed from 15 to 18 pairs of radioles terminating with long radiolar tips, as long as about 10–15 pairs of pinnules (Fig 9B). Several specimens showed the presence of the eggs within the crown, suggesting brooding (Fig 6C). Dorsal lips were as long as 1/3 of the crown (Fig 9E). The microstylodes appeared long (notoriously longer than rachis width), thin and digitiform in all the examined individuals, but not covering the radiolar eyes that appeared highly developed (covering 3/4 of side of radiolar rachis at mid-radiolar length) and orange coloured (Figs 8D and 9A, 9C). Macrostylodes were strap-like, 2–3 times longer than microstylodes and 1–4 pairs per radiole (Figs 8C, 8D and 9C). The basal microstylodes appeared unpaired (Fig 6C). Thoracic and abdominal uncini with 2–3 rows of teeth over the main fang (Fig 9D and 9F).

In Fig 10, the morphological features of *B. boholense* specimens from its original area of distribution (Indonesia) are shown. Microstylodes appeared digitiform and long as rachis width or slightly longer, while macrostylodes were 2–3 times longer than microstylodes and tongue-like (flattened) in shape (Fig 10B, 10D, 10E and 10F). The basal microstylodes appeared small (as long as rachis width or slightly longer) and unpaired (Fig 10A). Radioles showed short radiolar tips (as long as equivalent space of 6–8 pinnules) (10C) and radiolar eyes appeared small (covering less than 1/2 of side of radiolar rachis at mid-radiolar length) (Fig 10D, 10E and 10F). Thoracic and abdominal uncini showed two rows of teeth over the main fang (Fig 10G).

## Discussion

### Taxonomic status of the Mediterranean taxon

This study revealed significant genetic differentiation in the mitochondrial gene COI between Mediterranean and extra-Mediterranean *Branchiommma* populations, strongly suggesting that they represent two different species. Observed values of pairwise  $\Phi_{ST}$  and average K2P genetic distance denoted that the two groups of populations belong to two different congeneric species, indeed the levels of genetic distance (K2P) observed between the two groups of populations were similar to those reported for other congeneric polychaete species [18,79–85]. The results obtained from the phylogenetic analysis emphasized the strong separation between the two forms as well: sequences obtained from extra-Mediterranean samples and Mediterranean ones clustered in two distinct and well supported clades.

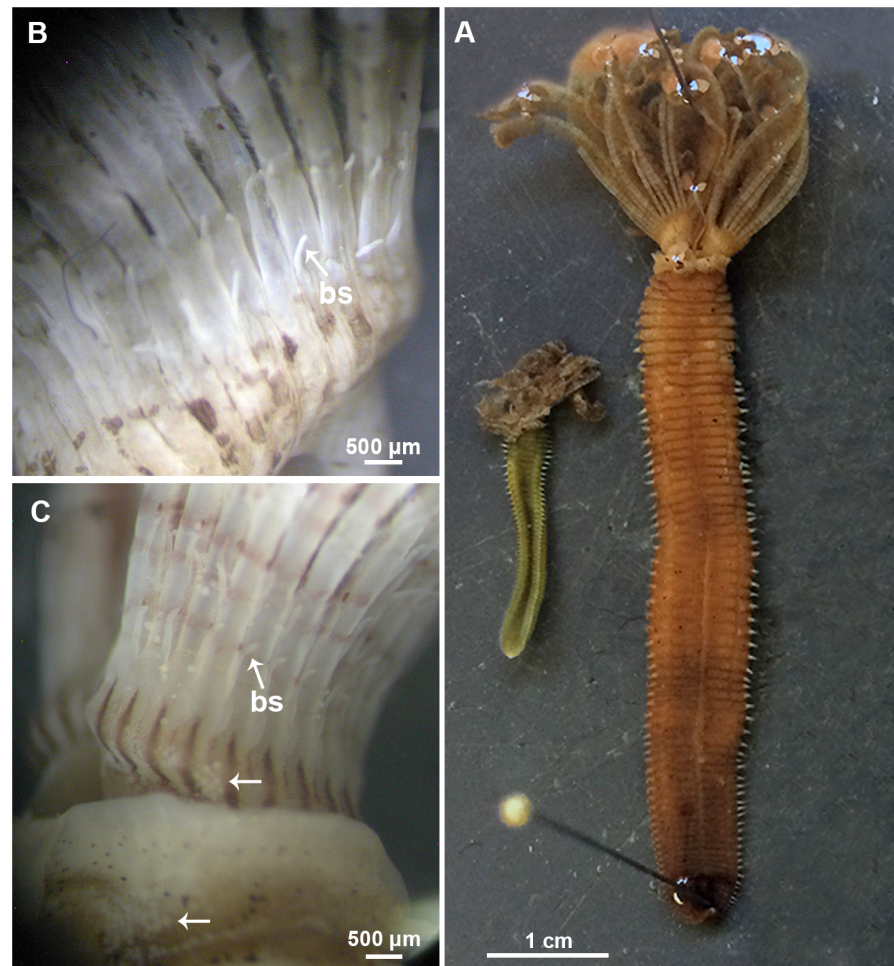

**Fig 6. Morphological comparison of Mediterranean (Taranto) and extra-Mediterranean (Mazatlán) *Branchiommma* samples.** (A) Complete specimens in ventral view; r: Mediterranean specimen, l: extra-Mediterranean specimen. (B) Mediterranean specimen. Basal part of the crown with the detail of the first pair of stylodes. (C) Extra-Mediterranean specimen. Basal part of the crown with the detail of the first pair of stylodes. The arrow indicates egg masses.

<https://doi.org/10.1371/journal.pone.0197104.g006>

These results led to a careful re-examination of the morphology of the two groups of samples that were molecularly divergent. The morphological features observed for extra-Mediterranean specimens correspond to those reported for the species *B. bairdi* [86]. By contrast, the morphology of the Mediterranean taxon led to presumably reconsider the species *B. boholense* for our Mediterranean material originally identified as *B. bairdi*. Indeed, Mediterranean specimens showed morphological features comparable to those reported for specimens from Indonesia, reviewed in this paper (Fig 10) and identified as *B. boholense* [22] as well as to the syntype examined by Cepeda & Rodríguez-Flores [41]. Besides, the taxonomic characters observed for our Mediterranean material did not coincide with those considered diagnostic for the identification of any other *Branchiommma* taxa, including species native of the Mediterranean area. However, lacking molecular data for the material from Indonesia, it was not possible to corroborate our morphological results with the molecular data during this phase. This approach is highly suggested in the future to validate our findings.

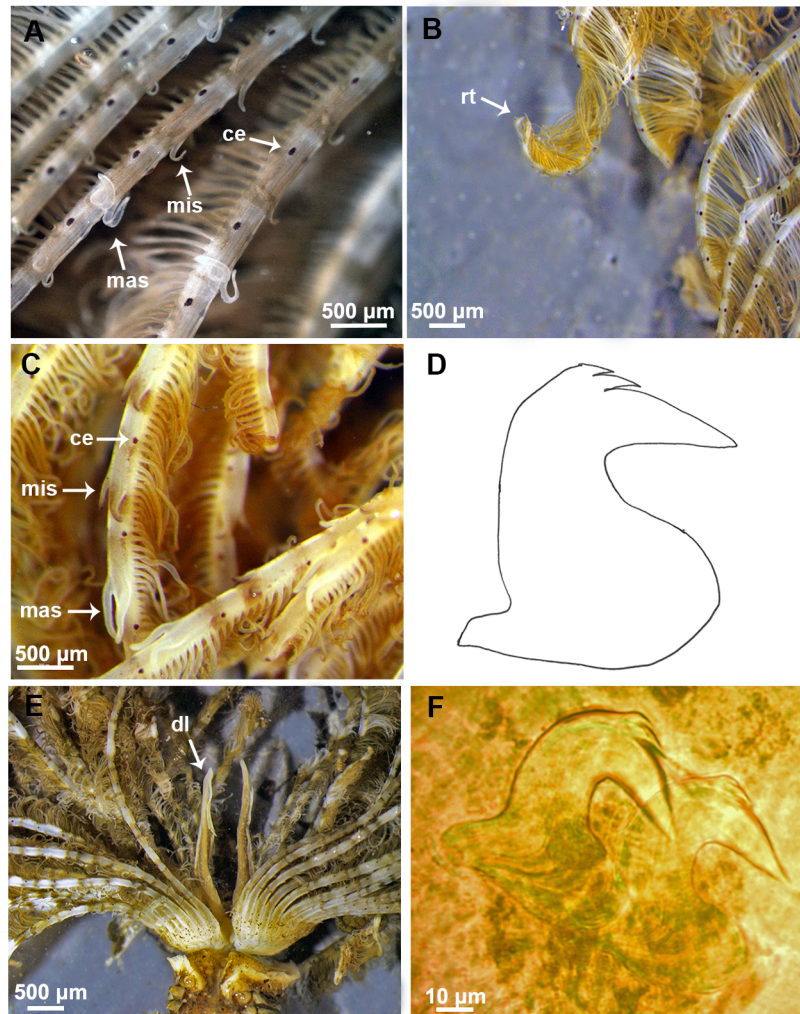

**Fig 7. Morphological features of a Mediterranean specimen.** (A) Detail of the radioles with stylodes, macrostylodes and radiolar eyes. (B) Detail of the radiolar tips. (C) Macrostylodes and microstylodes. (D) Drawn of thoracic avicular uncinus. (E) Dorsal lips. (F) Thoracic avicular uncini. mis: microstylodes, mas: macrostylodes, ce: compound eyes, rt: radiolar tips, dl: dorsal lips.

<https://doi.org/10.1371/journal.pone.0197104.g007>

It is worth mentioning that biological data on reproduction and population dynamics concerning the Mediterranean form previously referred as *B. bairdi* [29,30] could probably be attributed to *B. boholense*. Significant biological differences found between the Mediterranean populations and Mazatlán (Gulf of California) population were previously explained as adaptation to a new environment [29,30]. Results from the present study led to reconsider these biological differences due to the fact that the two examined taxa are actually different species. Indeed, the two species differ in the reproductive features, with a different period and mode of reproduction. Brooding was reported for Malta and Mazatlán populations [26,45], while external fertilization occurs in Mediterranean specimens [30]. Moreover, no sign of asexual reproduction was found in the Mediterranean taxon contrary to what has been reported for *B. bairdi* [45]. During the morphological analysis, the presence of the eggs among radioles in the crown of *B. bairdi* were often detected, and never observed in the Mediterranean taxon presumably identified in this study as *B. boholense*.

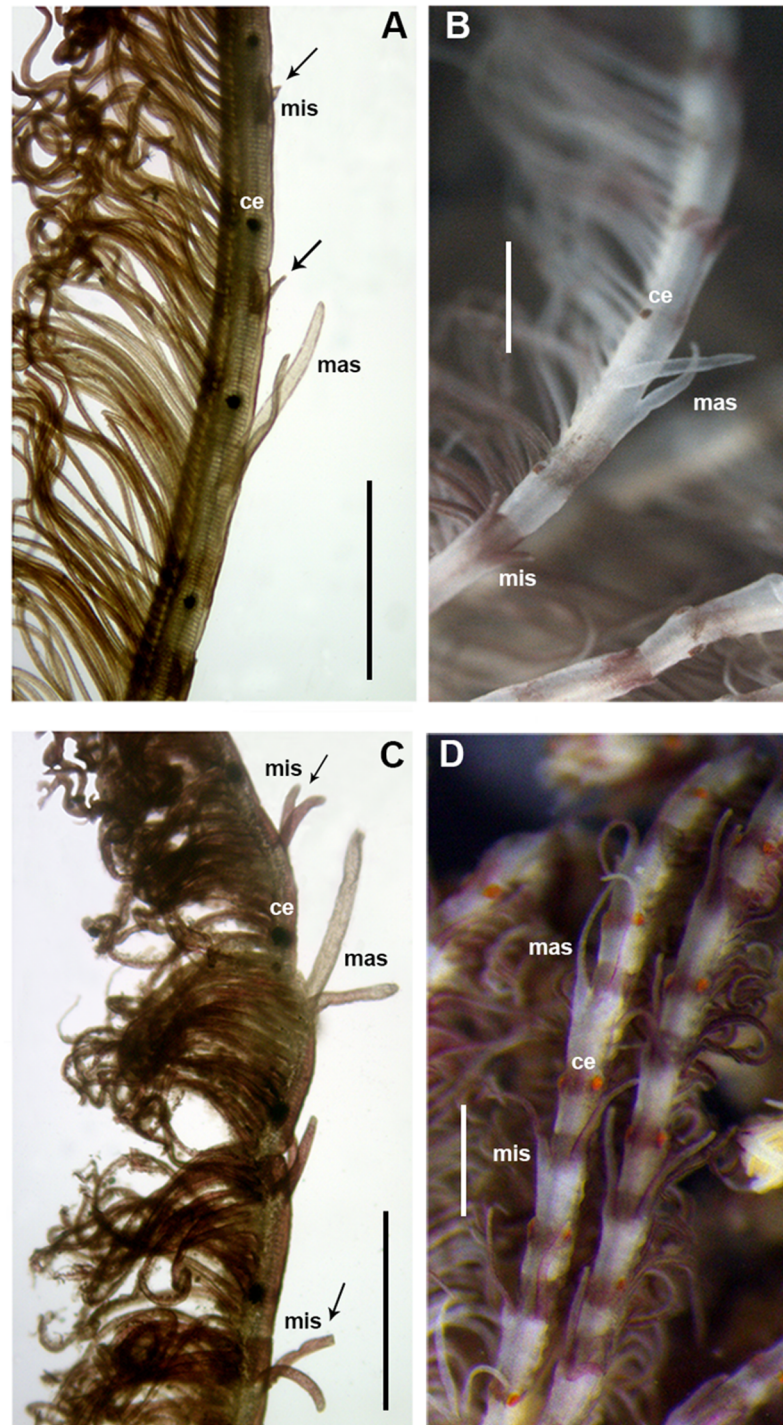

**Fig 8. Morphological comparisons of branchial radioles for Mediterranean (Taranto) and extra-Mediterranean (Mazatlán) specimens.** Details of radioles with microstylodes, macrostylodes and radiolar eyes from Mediterranean (A, B) and extra-Mediterranean (C, D) samples. mis: microstylodes, mas: macrostylodes, ce: compound eyes. Arrows highlight the different length of microstylodes between Mediterranean and extra-Mediterranean samples. Scale bars: A-D, 500  $\mu$ m.

<https://doi.org/10.1371/journal.pone.0197104.g008>

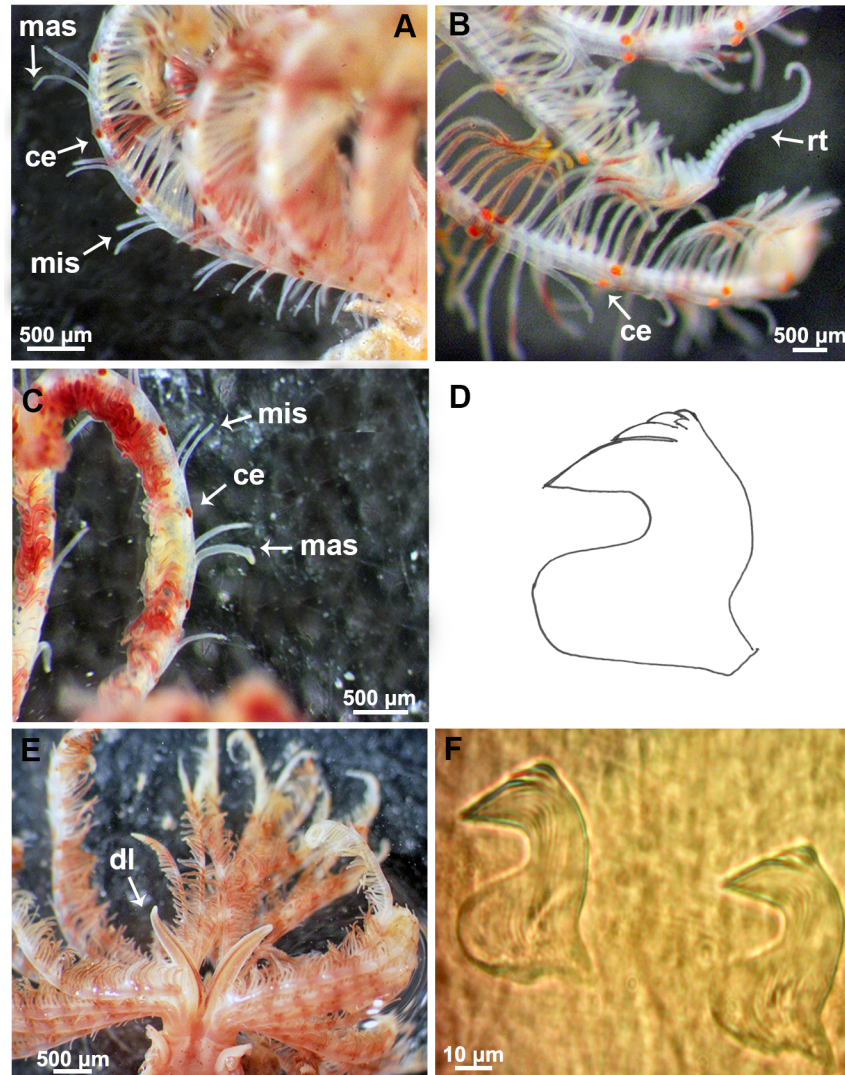

**Fig 9. Morphological features of an extra-Mediterranean specimen.** (A) Detail of the radioles with stylodes, macrostylodes and radiolar eyes. (B) Detail of the radiolar tips. (C) Macrostylodes, microstylodes and radiolar eyes. (D) Drawing of thoracic avicular uncinus. (E) Dorsal lips. (F) Thoracic avicular uncini. mis: microstylodes, mas: macrostylodes, ce: compound eyes, rt: radiolar tips, dl: dorsal lips.

<https://doi.org/10.1371/journal.pone.0197104.g009>

**Morphological distinctiveness.** As already reported by different authors [17,22,25,26,37, 41,42], *Branchiommma bairdi* and *B. boholense* are difficult to distinguish and it is likely that in the past the two species have been frequently misidentified. According to Tovar-Hernández et al. [43], the main distinctive characters separating these two species are the thoracic uncini dentition and the different morphology of macrostylodes: strap-like macrostylodes and 2–3 rows of teeth on thoracic uncini are present in *B. bairdi*, whereas *B. boholense* has flattened tongue-like macrostylodes and thoracic uncini with one large tooth. However, recently, Keppel et al. [17] and Cepeda & Rodríguez-Flores [41] showed that also in *B. boholense* two rows of teeth can be present, suggesting that this character cannot be considered for the separation of the two taxa.

Our morphological observations on Mediterranean and extra-Mediterranean specimens as well as on individuals from Indonesia integrated the results reported by Cepeda & Rodríguez-



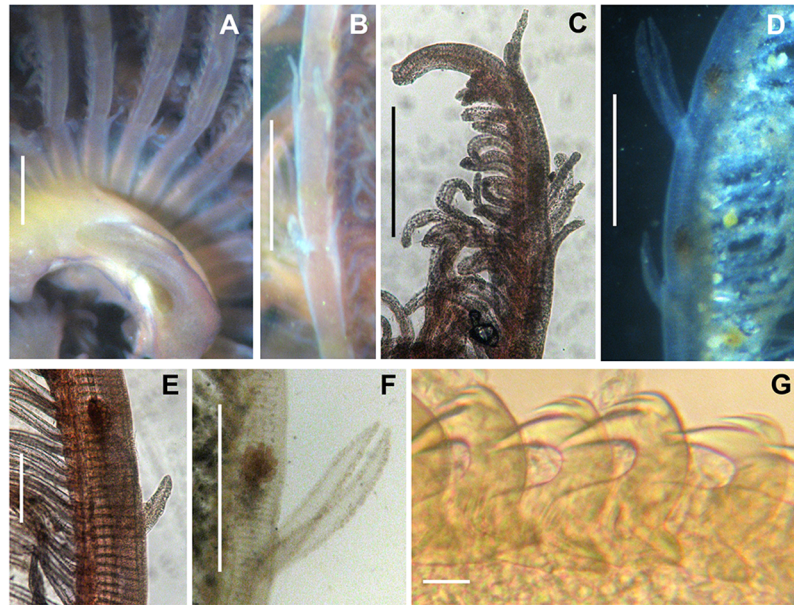

**Fig 10. Morphological features of *B. boholense* specimens from Indonesia.** (A) Branchial lobe showing the unpaired basal stylodes. (B) Detail of microstylodes and macrostylodes along the radiole. (C) Detail of the radiolar tips. (D) Detail of radiole with stylodes (micro and macro) and radiolar eyes. (E) Detail of microstylodes along the radiole. (F) Detail of macrostylodes along the radiole. (G) Detail of thoracic avicular uncini. Scale bars: A-D, F, 500  $\mu$ m; E, 150  $\mu$ m; G, 10  $\mu$ m.

<https://doi.org/10.1371/journal.pone.0197104.g010>

Flores [41] that compared some Mediterranean material identified as *B. bairdi* with the syntype of *B. boholense* giving some useful suggestion about the main differences separating the two taxa.

Results from this study suggested that the main discrete morphological differences between the two taxa are the shape of macrostylodes, the development of microstylodes and radiolar eyes, coupled with differences in body size and in the number of teeth over the main fang of thoracic and abdominal uncini. Specimens from Mediterranean populations, presumably to be considered as *B. boholense*, showed mainly flattened, tongue-like macrostylodes, short microstylodes (as long as rachis width or slightly longer) and small brownish radiolar eyes (covering less than 1/2 of side of radiolar rachis). By contrast, specimens of *B. bairdi* had cylindrical, strap-like macrostylodes, long microstylodes (notoriously longer than rachis width) and big red-pigmented radiolar eyes (covering more than 3/4 of side of radiolar rachis). Moreover, both species showed more than one row of teeth over the main fang. Nevertheless, in *B. bairdi* the main fang appeared followed by 2–3 rows of teeth, while in the Mediterranean taxon as well as in specimens from Indonesia (Fig 10G) reviewed in this paper, only two rows of teeth over the main fang seemed to be present.

The slight difference observed between the morphology of the Mediterranean material and the syntype of *B. boholense* examined by Cepeda & Rodríguez-Flores [41], could be due to the fact that the syntype was a juvenile (small body size and short, blunt radiolar tips typical of juveniles or regenerating worms), and it was in very bad preserved conditions. In particular, the difference between the two taxa concerning the first, basal stylodes that were reported paired for *B. boholense* by Cepeda & Rodríguez-Flores [41], was probably a mistake due to bad preservation, because the distance between the base of the crown and their appearance suggests that they probably referred to the second pair of stylodes that obviously are paired. In addition, well preserved material of *B. boholense* from Indonesia also examined in this study (4

adult and 3 juvenile specimens), only present unpaired basal stylodes (Fig 10A). However, Capa et al. [18] already emphasized the presence of basal stylodes being paired in some few taxa (*B. lucullanum*, *B. bombyx* and *B. galei*) and showing plasticity in the majority of the other studied *Branchiomm* species. But the relation of presence-absence of this feature according to juvenile or adult stages, or regenerating worms have not been determined.

As this study shows, two invasive species of *Branchiomm* in the Mediterranean present different reproductive modes and discrete morphological differences, including body size. Capa et al. [18] already highlighted that the traditional diagnostic morphological features of species in the genus *Branchiomm* are greatly homoplastic and polymorphic, and Keppel et al. [17] emphasized that other characters including body size, radiolar crown, dorsal lips and thorax length are not informative, as they are impacted by anaesthetics and fixation methods, or by the regeneration process. Moreover, during the process of morphological identification other difficulties can arise as it is not always possible to work using live specimens or well fixed or preserved samples, and sometimes may not be possible to corroborate identifications using type materials. Six species of *Branchiomm* have been reported as alien worldwide, but it appears that many additional NIS remain undetected for this family, in multiple geographic regions around the world. Consequently, for early detection programs of invasive species we recommend the combined use of molecular and morphological approaches for *Branchiomm* species. It would work at least for *B. bairdi*, *B. boholense*, *B. bombyx*, *B. luctuosum* and other seven unnamed, but alien species included in Capa et al. [18]. However, a major revision of type materials is still needed in order to provide the available names for those alien species.

**Species distribution within the Mediterranean basin.** On the basis of both molecular and morphological analysis the present knowledge led to reconsider the distribution of *Branchiomm bairdi* and *B. boholense* within the Mediterranean basin.

Both species are present in the Mediterranean area, although, following the results of this study, the previous records of *B. bairdi* reported for the Italian coast should probably represent *B. boholense* [25,26,27,29,30,87]. Even though *B. boholense* seems to have been present in the Eastern basin since the early 1900s [22], recently the species has shown to spread and establish successfully in the central and western Mediterranean basin as shown by its recent reports along the Italian coast [25–27] and in the south-eastern coast of Spain [37]. By contrast, *B. bairdi* was actually collected in the islands of Malta and Formentera [26,41], and along the Turkish and Tunisian coasts [38, 40].

The presence of *B. bairdi* in the western side of the basin and its records at Canary and Madeira Islands [26,42] is consistent with the probable introduction of *B. bairdi* from the Atlantic Ocean throughout the Gibraltar Strait. By contrast, considering the Indo-Pacific origin of *B. boholense* and that the first findings of the species are from the eastern side of the basin [22,34], the species might have entered the Mediterranean through the Suez Canal.

## Genetic structure

The mitochondrial genetic diversity observed within populations of the examined species are comparable to those reported for other polychaetes [88,89]. However, different genetic scenarios are displayed for the two introduced *Branchiomm* species, with the Mediterranean taxon (presumably *B. boholense*) showing high levels of genetic diversity, and, otherwise, the introduced Pacific and Atlantic *B. bairdi* populations exhibiting low levels of genetic diversity.

Different ranges of genetic diversity have been documented for invasive species according to their life history traits and to the different type of introductions [57,90–93]. As proposed by Voisin et al. [94], invasive species typically present two distinct patterns of genetic diversity: a reduced genetic variability associated to stochastic introductions of a small number of

individuals that are more likely subjected to successive bottleneck, or increased levels of genetic diversity due to multiple introductions.

The pattern of genetic diversity of (presumably) *B. boholense* observed in the Mediterranean basin is in accordance with the second hypothesis. Indeed, the expansion of this species across the Mediterranean is very recent with possible recurrent introduction events recorded through different years and in localities that are wide apart across the basin [25,26,34,37]. A similar pattern of high genetic variability associated to continuous introductions from different sources was observed in some invasive ascidian species such as *Styela clava* Herdman, 1881 [57] and *Styela plicata* (Lesueur, 1823) along the Italian coasts [92].

This pattern of increased within-population genetic diversity may be also associated to the life history traits of *B. boholense*, which showed a short life span, associated with a fast growth, early maturity and a rapid generation turnover ([29] as *B. bairdi*). Moreover, this species displays a great ecological plasticity and adaptability in colonizing different habitats and substrates. In particular, among the examined sites around Ischia Island the species was collected also at the Castello Aragonese vent's system, a venting area where intense CO<sub>2</sub> emissions lower the seawater pH up to 6.6 values [95] and where the few polychaete species collected in this site respond to stress either by acclimating via phenotypic plasticity (e.g the sabellid *Amphiglena mediterranea*) or through genetic adaptation (e.g. the nereidid *Platynereis spp*) [85,96,97]. *Branchiommata boholense* seems to acclimate to the CO<sub>2</sub> vent conditions like *A. mediterranea*, as the vent-inhabiting populations are not genetically distinct from nearby non-acidified populations. The ecological plasticity of the species coupled with the high genetic diversity observed might in turn enhance its potential of invasion. A connection between high intrinsic genetic diversity and high ecological plasticity was observed also for introduced populations of the Mediterranean species *Sabella spallanzanii* (Gmelin, 1791) in Australian waters [98], where it is considered a pest species [66].

A different scenario of within-population genetic diversity was observed for the studied native and introduced populations of *B. bairdi*. As expected, populations sampled from the original distribution range of the species (Tampa Bay and Veracruz) showed very high values of diversity mainly linked to their higher size and stability compared to the introduced ones. Indeed, these populations belong to a taxon with a huge Caribbean distribution, described for Bermuda in 1885, but successively found in Florida [99] and in Veracruz [100–102].

By contrast, the low values of diversity observed in the studied introduced *B. bairdi* populations (Madeira, Mazatlán, Galapagos, Hawaii) and their monomorphic condition denoted the occurrence of recent bottlenecks from a single introduction event that accounted for the total loss of the native genetic variability observed. This is also consistent with the recent age of introduction of *B. bairdi* in the southern Gulf of California [43] as well as in Galapagos, Hawaii [20,68] and Madeira Island [42]. The recent introduction of this species within Madeira fauna can be inferred considering that Madeira is a site whose fauna is well-known and highly investigated over time [103].

Moreover, Madeira, Galapagos and Hawaii are island populations and, as already observed in other studies [104,105], such populations show lower levels of genetic variation than their mainland counterparts as stochastic introduction events counteract the arrival of new alleles in the gene pool. However, the pattern of diversity observed in the introduced populations of *B. bairdi* can be due to the presence of asexual reproduction [45] as well, with the propagation of clones that could have genetically homogenized the population [106,107]. Nevertheless, this low genetic diversity does not seem to affect the successful invasion of the species as already observed for other invasive taxa [57,108].

Pair-wise  $F_{ST}$  and K2P analysis evidenced a genetic similarity among the Mediterranean populations as well as among the extra-Mediterranean ones, suggesting the presence of a

certain relatedness among the Mediterranean populations and between native and introduced *B. bairdi* populations as well.

The presence of connections between the different populations of the same species was demonstrated also in the median joining network of haplotypes. The network showed two distinct haplogroups representing Mediterranean and extra-Mediterranean detected mitochondrial haplotypes. In both haplogroups the occurrence of just one haplotype shared by the majority of the individuals confirmed the degree of connections between the Mediterranean populations of presumably *B. boholense* as well as between the native and introduced populations of *B. bairdi*. As regards the Mediterranean basin, the occurrence of two haplotypes shared by different populations suggested the presence of a low but existing gene flow between these populations likely mediated by local vessels rather than by natural dispersion of the species as supported by the *in vitro* short pelagic larval phase of the species [30]. The Mediterranean basin is highly urbanized and a dense network of harbors and marinas are present along its coasts [109,110], likely acting as sites of secondary dispersal of non-indigenous species [93,111]. Likewise, the relatedness among native populations of *B. bairdi* and individuals introduced in the Pacific Ocean and in Madeira Island was demonstrated by the fact that these populations share the same haplotype detected in native populations. This genetic structure corroborates the hypothesis that the introduction of *B. bairdi* both in the East Pacific and in the East Atlantic occurred from the Caribbean as already suggested by Tovar-Hernández et al. [45,46] and Ramalhosa et al. [42] for the port of Mazatlán and Madeira Island, respectively. Moreover, this scenario brings attention to the Panama Canal. The Panama Canal is an important point of passage for the maritime traffic with thousands of ships transit the Canal annually [112] and, as already reported by several studies [113–117] it is a potential corridor for the movement of marine species between the Pacific and Atlantic Ocean. It is worth mentioning that haplotype 9 is clearly distinctive from the remaining *B. bairdi* samples (average genetic distance, K2P = 0.015) (Figs 2 and 3). No morphological differences were observed and we therefore include this haplotype under *B. bairdi*. It comprises samples from Veracruz and Tampa Bay (native range) but also a single individual from the Galapagos Islands (introduced range). We have no information about the underlying causes for the genetic split, but the wide geographic distribution of this haplotype underlines its invasive potential.

In this study, the combined use of both molecular and morphological data allowed to clarify the taxonomic status of the two alien *Branchiommma* species and the genetic structure of the studied populations, providing reliable information on the distribution range of *B. bairdi* outside its native range and on the invasion scenario of (presumably) *B. boholense* in the Mediterranean Sea.

Further studies with the use of other molecular markers and a bigger pool of samples could corroborate our findings and provide a better understanding of two species invasion process for a complete and exhaustive management program.

## Supporting information

**S1 Table. Distribution and frequency of COI haplotypes (rows) across the studied populations (columns).**

(CSV)

**S2 Table. Pairwise  $\Phi_{ST}$  values of molecular differentiation between samples.** Values that were significant are in bold.

(CSV)

**S3 Table. Average Kimura two-parameter (K2P) distance between the different sampled localities.** Values that are significant are in bold.

(CSV)

**S4 Table. List of specimens utilized for the study with the related GenBank accession numbers and sampling localities.**

(CSV)

## Acknowledgments

We are grateful to Gregory Ruiz for the use of Invasion lab (SERC) collection, the Charles Darwin Research Station's (CDRS) marine biological laboratory (BioMar) in Puerto Ayora and to Ecuador Government for the specimens collected under the special permit of the Galapagos Marine Reserve. We wish also to thank Patricio Ramalhosa and Canning-Clode of the Marine and Environmental Science Centre at Madeira Island as well as Maria Francisca Giménez Casalduero of the University of Alicante for their useful help in samples collection. We would thank also Sara Román and Melih Ertan Çinar for the courteous concession of *Branchiomm*a specimens collected from the Spanish and Turkish coasts. We are grateful to Justin Hillard of the Texas A&M University at Galveston for his suggestions and help in molecular analysis and to Margherita Licciano of the University of Salento for her valuable comments to the manuscript.

## Author Contributions

**Conceptualization:** Anja Schulze, María Ana Tovar-Hernández, Erica Keppel, Maria Cristina Gambi, Adriana Giangrande.

**Data curation:** Michela Del Pasqua.

**Formal analysis:** Michela Del Pasqua.

**Methodology:** Anja Schulze.

**Resources:** María Ana Tovar-Hernández, Erica Keppel, Maria Cristina Gambi.

**Supervision:** Adriana Giangrande.

**Writing – original draft:** Michela Del Pasqua.

**Writing – review & editing:** Anja Schulze, María Ana Tovar-Hernández, Erica Keppel, Marco Lezzi, Maria Cristina Gambi, Adriana Giangrande.

## References

1. Carlton JT. Pattern, process, and prediction in marine invasion ecology. *Biol Conserv.* 1996; 78: 97–106. [http://dx.doi.org/10.1016/0006-3207\(96\)00020-1](http://dx.doi.org/10.1016/0006-3207(96)00020-1).
2. Ruiz GM, Fofonoff P, Hines HA. Non-indigenous species as stressors in estuarine and marine communities: Assessing invasion impacts and interactions. *Limnol Oceanogr.* 1999; 44: 950–972. [http://dx.doi.org/10.4319/lo.1999.44.3\\_part\\_2.0950](http://dx.doi.org/10.4319/lo.1999.44.3_part_2.0950).
3. Grosholz E. Ecological and evolutionary consequences of coastal invasions. *Trends Ecol Evol.* 2002; 17(1): 22–27. [https://doi.org/10.1016/S0169-5347\(01\)02358-8](https://doi.org/10.1016/S0169-5347(01)02358-8).
4. Bax N, Williamson A, Aguero M, Gonzalez E, Geeves W. Marine invasive alien species: a threat to global biodiversity. *Mar Policy.* 2003; 27: 313–323. [https://doi.org/10.1016/S0308-597X\(03\)00041-1](https://doi.org/10.1016/S0308-597X(03)00041-1).
5. Blakeslee AMH, McKenzie CH, Darling JA, Byers JE, Pringle JM, Roman J. A hitchhiker's guide to the Maritimes: anthropogenic transport facilitates long-distance dispersal of an invasive marine crab to Newfoundland. *Divers Distrib.* 2010; 16: 879–891. <https://doi.org/10.1111/j.1472-4642.2010.00703.x>

6. Pyšek P, Richardson DM. Invasive Species, Environmental Change and Management, and Health. *Annu Rev Environ Resour.* 2010; 35: 25–55. <https://doi.org/10.1146/annurev-environ-033009-095548>
7. Corriero G, Pierri C, Accoroni S, Alabiso G, Bavestrello G, Barbone E, et al. Ecosystem vulnerability to alien and invasive species: a case study on marine habitats along the Italian coast. *Aquatic Conserv: Mar Freshw Ecosyst.* 2015; <http://doi.org/10.1002/aqc.2550>.
8. Hewitt CL, Willing J, Bauckham A, Cassidy AM, Cox CMS, Jones L, et al. New Zealand marine biosecurity: delivering outcomes in a fluid environment. *New Zeal J Mar Freshw.* 2004; 38: 429–438. <http://dx.doi.org/10.1080/00288330.2004.9517250>.
9. Hewitt CL, Campbell ML. Mechanisms for the prevention of marine bioinvasions for better biosecurity. *Mar Pollut Bull.* 2007; 55: 395–401. <https://doi.org/10.1016/j.marpolbul.2007.01.005> PMID: 17379259
10. Albert RJ, Lishman JM, Saxena JR. Ballast water regulations and the move toward concentration based numeric discharge limits. *Ecol Appl.* 2013; 23: 289–300. <https://doi.org/10.2307/23440994> PMID: 23634581
11. Ojaveer H, Galil BS, Minchin D, Olenin S, Amorim A, Canning-Clode J, et al. Ten recommendations for advancing the assessment and management of non-indigenous species in marine ecosystems. *Mar Policy.* 2013; 44: 1–6. <http://dx.doi.org/10.1016/j.marpol.2013.08.019>.
12. Zenetos A, Çınar ME, Crocetta F, Golani D, Rosso A, Servello G, et al. Uncertainties and validation of alien species catalogues: The Mediterranean as an example. *Estuar Coast Shelf Sci.* 2017; 191: 171–187. <http://dx.doi.org/10.1016/j.ecss.2017.03.03>.
13. Zenetos A, Gofas S, Verlaque M, Çınar ME, García Raso JE, Bianchi CN et al. Alien species in the Mediterranean Sea by 2010. A contribution to the application of European Union's Marine Strategy Framework Directive (MSFD). Part I. Spatial distribution. *Mediterr Mar Sci.* 2011; 12: 509–514. <http://dx.doi.org/10.12681/mms.49>.
14. Çınar ME. Alien polychaete species worldwide: current status and their impacts. *JMBAUK.* 2013; 93: 1257–1278. <http://dx.doi.org/10.1017/S0025315412001646>.
15. López E, Richter A. Non-indigenous species (NIS) of polychaetes (Annelida: Polychaeta) from the Atlantic and Mediterranean coasts of the Iberian Peninsula: an annotated checklist. *Helgol Mar Res.* 2017; 71: 19. <https://doi.org/10.1186/s10152-017-0499-6>
16. Holloway MG, Keough MJ. Effects of an introduced polychaete, *Sabella spallanzanii*, on the development of epifaunal assemblages. *Mar Ecol Prog Ser.* 2002; 236: 137–154.
17. Keppel E, Tovar-Hernández MA, Ruiz G. First record and establishment of *Branchiommma coheni* (Polychaeta: Sabellidae) in the Atlantic Ocean and review of non-indigenous species of the genus. *Zootaxa.* 2015; 4058(4): 499–518. <http://doi.org/10.11646/zootaxa.4058.4>.
18. Capa M, Pons J, Hutchings P. Cryptic diversity, intraspecific phenetic plasticity and recent geographical translocations in *Branchiommma* (Sabellidae, Annelida). *Zool Scrip.* 2013; 42: 637–655. <https://doi.org/10.1111/zsc.12028>
19. Giangrande A, Licciano M. Factors influencing latitudinal pattern of biodiversity: an example using Sabellidae (Annelida, Polychaeta). *Biodivers Conserv.* 2004; 13(9): 1633–1646. <https://doi.org/10.1023/B:BIOC.0000029327.63397.6b>.
20. Keppel E, Tovar-Hernández MA, Ruiz GM. New records of the non-indigenous species *Branchiommma bairdi* and *B. conspersum* (Polychaeta: Sabellidae) in the United States of America: Pacific side. *Bioinvasions Rec.* Forthcoming.
21. Bianchi CN. Serpuloidea (Annelida, Polychaeta) delle lagune costiere laziali e campane. *An Mus Civ Stor Nat Gen.* 1983; 84: 231–243.
22. Knight-Jones P, Knight-Jones W, Ergen Z. Sabelliform polychaetes, mostly from Turkey's Aegean coast. *J Nat Hist.* 1991; 25: 837–858. <http://dx.doi.org/10.1080/00222939100770561>.
23. Licciano M, Giangrande A, Gambi MC. Reproduction and simultaneous hermaphroditism in *Branchiommma luctuosum* (Polychaeta, Sabellidae) from the Mediterranean Sea. *Inv Biol* 2002; 121: 55–65. <https://doi.org/10.1111/j.1744-7410.2002.tb00129.x>
24. Licciano M, Stabili L, Giangrande A, Cavallo RA. Bacterial accumulation by *Branchiommma luctuosum* (Annelida: Polychaeta): a tool for biomonitoring marine systems and restoring polluted waters. *Mar Environ Res.* 2006; 63: 291–302. <https://doi.org/10.1016/j.marenvres.2006.11.003> PMID: 17208292
25. Giangrande A, Cosentino A, Presti CL, Licciano M. Sabellidae (Annelida) from the Faro coastal lake (Messina, Ionian Sea), with the first record of the invasive species *Branchiommma bairdi* along the Italian coast. *Med Mar Sci.* 2012; 13(2): 283–93. <https://doi.org/10.12681/mms.310>
26. Arias A, Giangrande A, Gambi MC, Anadon N. Biology and new records of the invasive species *Branchiommma bairdi* (Annelida: Sabellidae) in the Mediterranean Sea. *Med Mar Sci.* 2013; 14: 162–171. <https://doi.org/10.12681/mms.363>.

27. Giangrande A, Licciano M, Lezzi M, Pierri C. Allochthonous *Branchiomm* species (Annelida, Sabellidae) in the Mediterranean Sea. A case of study in the Mar Grande of Taranto. *Biol Mar Med* 2014; 21: 93–96.
28. Mastrototaro F, Chimienti G, Matarrese A, Gambi MC, Giangrande A. Growth and population dynamics of the non-indigenous species *Branchiomm luctuosum* Grube (Annelida, Sabellidae) in the Ionian Sea (Mediterranean Sea). *Mar Ecol*. 2014; 36(3): 517–529. <https://doi.org/10.1111/maec.12160>
29. Lezzi M, del Pasqua M, Pierri C, Giangrande A. Settlement and population dynamics of the alien invasive *Branchiomm bairdi* (Annelida: Sabellidae) in the Mediterranean Sea: two years of observations in the Gulf of Taranto (Italy). *Mar Biol Res*. 2016; 12(8): 830–841. <http://dx.doi.org/10.1080/17451000.2016.1206940>.
30. Del Pasqua M, Lezzi M, Licciano M, Giangrande A. Larval development and post-larval growth of *Branchiomm bairdi* (Annelida: Sabellidae) from a Mediterranean population. *Inv Biol* 2017; 136(2): 207–216. <https://doi.org/10.1111/ivb.12171>
31. Sordino P, Gambi MC. Prime osservazioni sulla biologia riproduttiva e sul ciclo vitale di *Branchiomm luctuosum* (Grube, 1869) (Polychaeta, Sabellidae). *Oebalia*. 1992; 17 (Suppl.): 425–427.
32. Arvanitidis C. Polychaete fauna of the Aegean Sea, inventory and new information. *Bull Mar Sci*. 2000; 60: 73–96.
33. Simboura N, Nicolaidou A. The Polychaetes (Annelida, Polychaeta) of Greece, checklist, distribution and ecological characteristics. In: National Centre of Marine Research editor. *Monographs on Marine Sciences* 4. Attiki, Athens; 2001. pp. 1–115.
34. Çinar ME. Polychaetes from the coast of northern Cyprus (eastern Mediterranean Sea), with two new records for the Mediterranean Sea. *Cah Biol Mar* 2005; 46: 143–161.
35. El Haddad M, Capaccioni-Azzati R, Garcia-Garrascosa M. *Branchiomm luctuosum* (Polychaeta: Sabellidae): a non-indigenous species at Valencia Port (western Mediterranean Sea, Spain). *Mar Biod Rec*. 2008; 1, e61. <http://dx.doi.org/10.1017/S1755267207006604>.
36. Licciano M, Giangrande A. The genus *Branchiomm* (Polychaeta: Sabellidae) in the Mediterranean Sea, with the description of *B. maerli* n. sp. *Sci Mar*. 2008; 72(2): 383–391. <http://dx.doi.org/10.3989/scimar.2008.72n2383>.
37. Román S, Pérez-Ruzafa A, López E. First record in the western Mediterranean Sea of *Branchiomm bohollense* (Grube, 1878) (Polychaeta: Sabellidae), and alien species of Indo-Pacific origin. *Cah Biol Mar*. 2009; 50: 241–250.
38. Çinar ME. Alien polychaete species (Annelida: Polychaeta) on the southern coast of Turkey (Levantine Sea, eastern Mediterranean), with 13 new records for the Mediterranean Sea. *J Nat Hist* 2009; 43: 2283–2328. <http://dx.doi.org/10.1080/00222930903094654>.
39. McIntosh WC. Report on the Annelida Polychaeta collected by H. M. S. Challenger during the years 1873–76, Report of the scientific results of the voyage of H. M. S. Challenger London, Zoology. 1885; 12: 1–554. <https://biodiversitylibrary.org/page/50688426>.
40. Khedhri I, Tovar-Hernández MA, Bonifácio P, Ahmed A, Aleya L. First report of the invasive species *Branchiomm bairdi* McIntosh, 1885 (Annelida: Polychaeta) along the Tunisian coast (Mediterranean Sea). *Biol Inv Rec*. 2017; 6(2): 139–145. <https://doi.org/10.3391/bir.2017.6.2.09>.
41. Cepeda D, Rodríguez-Flores PC. First record of the invasive worm *Branchiomm bairdi* (Annelida: Sabellidae) in the Balearic Sea (Western Mediterranean). *JMBAUK*. 2017; 1–9. <https://doi.org/10.1017/S0025315417001618>
42. Ramalhosa P, Camacho-Cruz K, Bastida-Zavala R, Canning-Clode J. First record of *Branchiomm bairdi* McIntosh, 1885 (Annelida: Sabellidae) from Madeira Island, Portugal (northeastern Atlantic Ocean). *Biol Inv Rec*. 2014; 3: 235–239. <https://doi.org/10.3391/bir.2014.3.4.04>.
43. Tovar-Hernández MA, Méndez N, Salgado-Barragán J. *Branchiomm bairdi*: a Caribbean hermaphrodite fan worm in the south-eastern Gulf of California (Polychaeta: Sabellidae). *Mar Biod Rec*. 2009; 2 (e43): 1–8. <http://dx.doi.org/10.1017/S1755267209000463>.
44. Tovar-Hernández MA, Méndez N, Villalobos-Guerrero TF. Fouling polychaete worms from the southern Gulf of California: Sabellidae and Serpulidae. *Syst & Biod*. 2009; 7: 1–18. <http://dx.doi.org/10.1017/S1477200009990041>.
45. Tovar-Hernández MA, Yáñez-Rivera B, Bortolini-Rosales JL. Reproduction of the invasive fan worm *Branchiomm bairdi* (Polychaeta: Sabellidae). *Mar Biol Res*. 2011; 7(7): 710–718. <http://dx.doi.org/10.1080/17451000.2010.547201>.
46. Tovar-Hernández MA, Yáñez-Rivera B. Capítulo IX Ficha técnica y análisis de riesgo de *Branchiomm bairdi* (McIntosh, 1885) (Polychaeta: Sabellidae). In: Low Pfeng AM, Peters-Recagno EM, editors. *Invertebrados marinos exóticos en el Pacífico mexicano*. Geomare AC, INE-Semarnat, México; 2012. pp. 167–190.

47. Tovar-Hernández MA, Yáñez-Rivera B, Villalobos-Guerrero T, Aguilar-Camacho JM, Ramírez-Santana ID. (2014) Capítulo 16 Detección de invertebrados exóticos en el Golfo de California. In: Low Pfeng AM, Quijón PA, Peters-Recagno EM, editors. Especies invasoras acuáticas: casos de estudio en ecosistemas de México. Segunda parte, distribución de especies invasoras: casos de estudio. SEMARNAT INECC UPEI, México; 2014. pp. 381–409.
48. Bastida-Zavala JR, Rodríguez-Buelna AS, de León-González JA, Camacho-Cruz KA, Carmona I. New records of sabellids and serpulids (Polychaeta: Sabellidae, Serpulidae) from the Tropical Eastern Pacific. *Zootaxa*. 2016; 4148(3): 401–457. <http://dx.doi.org/10.11646/zootaxa.4184.3.1>.
49. Capa M, Murray A. A taxonomic guide to the fanworms (Sabellidae, Annelida) of Lizard Island, Great Barrier Reef, Australia, including new species and new records. *Zootaxa*. 2015; 4019(1): 98–167. <http://doi.org/10.11646/zootaxa.4019.1.8>.
50. Holland BS. Genetics of marine bioinvasions. *Hydrobiologia*. 2000; 420: 63–71. <https://doi.org/10.1023/A:1003929519809>.
51. Darling J, Blum M. DNA-based methods for monitoring invasive species: a review and prospectus. *Biol Invasions*. 2007; 9: 751–765. <https://doi.org/10.1007/s10530-006-9079-4>.
52. Geller JB, Darling JA, Carlton JT. Genetic perspectives on marine biological invasions. *Ann Rev Mar Sci*. 2010; 2:367–393. <https://doi.org/10.1146/annurev.marine.010908.163745>.
53. Blanchet S. The use of molecular tools in invasion biology: an emphasis on freshwater ecosystems. *Fish Manag Ecol*. 2012; 19:120–132. <https://doi.org/10.1111/j.1365-2400.2011.00832.x>
54. Darling JA. Genetic studies of aquatic biological invasions: closing the gap between research and management. *Biol Invasions*. 2015; 17(3): 951–971. <https://doi.org/10.1007/s10530-014-0726-x>
55. Rius M, Turon X, Bernardi G, Volckaert FAM, Viard F. Marine invasion genetics: from spatio-temporal patterns to evolutionary outcomes. *Biol Invasions*. 2015; 17(3):869–885. <https://doi.org/10.1007/s10530-014-0792-0>
56. Estoup A, Guillemaud T. Reconstructing routes of invasion using genetic data: why, how and so what? *Mol Ecol*. 2010; 19: 4113–4130. <https://doi.org/10.1111/j.1365-294X.2010.04773.x> PMID: 20723048
57. Goldstien SJ, Dupont L, Viard F, Hallas PJ, Nishikawa T, Schiel DR, Gemmill NJ, Bishop JDD. Global phylogeography of the widely introduced North West Pacific ascidian *Styela clava*. *PLoS ONE*. 2011; 6(2): e16755. <https://doi.org/10.1371/journal.pone.0016755> PMID: 21364988
58. Pineda MC, López-Legentil S, Turon X. The whereabouts of an ancient wanderer: global phylogeography of the solitary ascidian *Styela plicata*. *PLoS One*. 2011; 6: e25495. <https://doi.org/10.1371/journal.pone.0025495> PMID: 21966535
59. Perez-Portela R, Arranz V, Rius M, Turon X. Cryptic speciation or global spread? The case of a cosmopolitan marine invertebrate with limited dispersal capabilities. *Sci Rep*. 2013; 3:3197. <https://doi.org/10.1038/srep03197> PMID: 24217373
60. Rius M, Darling JA. How important is intraspecific genetic admixture to the success of colonising populations? *Trends Ecol Evol*. 2014; 29(4): 233–242. <https://doi.org/10.1016/j.tree.2014.02.003> PMID: 24636862
61. Ahyong ST, Kupriyanova E, Burhardt I, Sun Y, Hutchings P, Capa M, et al. Phylogeography of the invasive Mediterranean fan worm, *Sabella spallanzanii* (Gmelin, 1791), in Australia and New Zealand. *JMBAUK*. 2017; 97(5): 985–991. <https://doi.org/10.1017/S0025315417000261>
62. Sun Y, Wong E, Keppel E, Williamson JE, Kupriyanova EK. A global invader or a complex of regionally distributed species? Clarifying the status of an invasive calcareous tubeworm *Hydroides dianthus* (Verrill, 1873) (Polychaeta: Serpulidae) using DNA barcoding. *Mar Biol*. 2017; 164: 28–39. <https://doi.org/10.1007/s00227-016-3058-9>
63. Dayrat B. Towards integrative taxonomy. *Biol. J. Linn. Soc.* 2005; 85: 407–415.
64. Will KP, Mishler BD, Wheeler QD. The perils of DNA Barcoding and the need for integrative taxonomy. *Syst. Biol.* 2005; 54: 844–851. <https://doi.org/10.1080/10635150500354878>.
65. Herre EA. Barcoding helps biodiversity fly. *P. Natl. Acad. Sci. USA*. 2006; 103:3949–3950. <https://doi.org/10.1073/pnas.0600550103> PMID: 16537464
66. Carvalho MR, Bockmann FA, Amorim DS, Brandão CR. Systematics must embrace comparative biology and evolution, not speed and automation. *Evol. Biol.* 2008; 35:150–157. <https://doi.org/10.1007/s11692-008-9018-7>.
67. Sheth BP, Thaker VS. DNA barcoding and traditional taxonomy: an integrated approach for biodiversity conservation. *Genome*. 2017; [dx.doi.org/10.1139/gen-2015-0167](https://doi.org/10.1139/gen-2015-0167).
68. Keppel E, Keith I, Ruiz GM, Carlton JT. New records of native and non-indigenous polychaetes (Annelida: Polychaeta) in the Galapagos Islands. *Aquatic Invasions. Bioinvasions Rec.* Forthcoming.



69. Ivanova NV, Zemlak TS, Hanner R, Hebert PDN. Universal primer cocktails for fish DNA barcoding. *Mol. Ecol. Notes*. 2007; 7: 544–48. <https://doi.org/10.1111/j.1471-8286.2007.01748.x>
70. Tamura K, Peterson D, Peterson N, Stecher G, Nei M, Kumar S. MEGA 5: molecular evolutionary genetics analysis using maximum likelihood, evolutionary distance, and maximum parsimony methods. *Mol Biol Evol*. 2011; 28: 2731–2739. <https://doi.org/10.1093/molbev/msr121>.
71. Librado P, Rozas J. DnaSP v5: a software for comprehensive analysis of DNA polymorphism data. *Bioinformatics*. 2009; 25: 1451–1452. <https://doi.org/10.1093/bioinformatics/btp187>.
72. Excoffier L, Laval LG, Schneider S. Arlequin ver. 3.0: An integrated software package for population genetics data analysis. *Evol Bioinform*. 2005; 1: 47–50.
73. Bandelt H, Forster P, Röhl A. Median-joining networks for inferring intraspecific phylogenies. *Mol Biol Evol*. 1999; 16: 37–48. <https://doi.org/10.1093/oxfordjournals.molbev.a026036>.
74. Ronquist F, Teslenko M, van der Mark P, Ayres DL, Darling A, Höhna S, et al. MrBayes 3.2: efficient bayesian phylogenetic inference and model choice across a large model space. *Syst Biol*. 2012; 61(3): 539–542. <https://doi.org/10.1093/sysbio/sys029>.
75. Durrin D, Taboada GL, Doallo R, Posada D. jModelTest 2: more models, new heuristics and parallel computing. *Nat Methods*. 2012; 9(8): 772–772. <https://doi.org/10.1038/nmeth.2109> PMID: 22847109
76. Capa M, Murray A. Combined morphological and molecular data unveils relationships of *Pseudobranchiomma* (Sabellidae, Annelida) and reveals higher diversity of this intriguing group of fan worms in Australia, including potentially introduced species. *Zookeys*. 2016; 622: 1–36.
77. Capa M, Bybee DR, Bybee SM. Establishing species and species boundaries in *Sabellastarte* Krøyer, 1856 (Annelida: Sabellidae): an integrative approach. *Org Divers Evol*. 2010; 10: 351–371. <https://doi.org/10.1007/s13127-010-0033-z>
78. Leray M, Knowlton Nancy. DNA barcoding and metabarcoding of standardized samples reveal patterns of marine benthic diversity. *Pnas*. 2015; 112(7):2076–2081. <https://doi.org/10.1073/pnas.1424997112> PMID: 25646458
79. Schulze ST, Rice SA, Simon JL, Karl SA. Evolution of poecilogony and the biogeography of North American populations of the polychaete *Streblospio*. *Evolution*. 2000; 54: 1247–1259. [https://doi.org/10.1554/0014-3820\(2000\)054\[1247:EOPATB\]2.0.CO;2](https://doi.org/10.1554/0014-3820(2000)054[1247:EOPATB]2.0.CO;2) PMID: 11005292
80. Barroso R, Klautau M, Sole-Cava AM, Paiva PC. *Eurythoe complanata* (Polychaeta: Amphinomidae), the ‘cosmopolitan’ fireworm, consists of at least three cryptic species. *Mar Biol*. 2010; 157:69–80. <https://doi.org/10.1007/s00227-009-1296-9>.
81. Carr CM, Hardy SM, Brown TM, Macdonald TA, Hebert PDN. A tri-oceanic perspective: DNA barcoding reveals geographic structure and cryptic diversity in Canadian polychaetes. *PLOS One*. 2011; 6: e22232. <https://doi.org/10.1371/journal.pone.0022232> PMID: 21829451
82. Nygren A, Pleijel F. From one to ten in a single stroke—resolving the European *Eumida sanguinea* (Phyllodocidae, Annelida) species complex. *Mol. Phylogenet. Evol*. 2011; 58: 132–141. <https://doi.org/10.1016/j.ympev.2010.10.010> PMID: 21034835
83. Schulze A. Six genetically distinct clades of *Palola* (Eunicidae, Annelida) from Lizard Island, Great Barrier Reef, Australia. *Zootaxa*. 2015; 4019: 695–706. <http://dx.doi.org/10.11646/zootaxa.4019.1.23>.
84. Hilliard J, Hajduk M, Schulze A. Species delineation in the *Capitella* species complex: geographic and genetic variation. *Invertebr Biol*. 2016; 135: 415–422. <https://doi.org/10.1111/ivb.12152>
85. Wäge J, Valvassori G, Hardege J, Schulze A, Gambi MC. The sibling polychaetes *Platynereis dumerilii* and *Platynereis massiliensis* in the Mediterranean Sea: are phylogeographic patterns related to exposure to ocean acidification? *Mar Biol*. 2017; 164: 199. <https://doi.org/10.1007/s00227-017-3222-x>
86. Tovar-Hernández MA, Knight-Jones P. Species of *Branchiomma* (Polychaeta: Sabellidae) from the Caribbean Sea and Pacific coast of Panama. *Zootaxa*. 2006; 1189: 1–37.
87. Lezzi M, Del Pasqua M, Pierri C, Giangrande A. Seasonal non-indigenous species succession in a marine macrofouling invertebrate community. *Biol Inv*. 2017; <https://doi.org/10.1007/s10530-017-1601-3>
88. Virgilio M, Fauvelot C, Costantini F, Abbiati M, Backeljau T. Phylogeography of the common ragworm *Hediste diversicolor* (Polychaeta: Nereididae) reveals cryptic diversity and multiple colonization events across its distribution. *Mol. Ecol*. 2009; 18: 1980–94. <https://doi.org/10.1111/j.1365-294X.2009.04170.x> PMID: 19344353
89. Cossu P, Maltagliati F, Pannacciulli FG, Simonini R, Massamba-N’Siala G, Casu M, et al. Phylogeography of *Ophryotrocha labronica* (Polychaeta, Dorvilleidae) along the Italian coasts. *Mar Ecol*. 2014; 36(4): 1088–1097. <https://doi.org/10.1111/maec.12203>

90. Kelly MW, Sanford E, Grosberg RK. Limited potential for adaptation to climate change in a broadly distributed marine crustacean. *Proc R Soc.* 2012; 279: 349–356. <https://doi.org/10.1098/rspb.2011.0542> PMID: 21653591
91. Pérez-Portela R, Turon X, Bishop JDD. Bottlenecks and loss of genetic diversity: spatio-temporal patterns of genetic structure in an ascidian recently introduced in Europe. *Mar Ecol Prog Ser.* 2012; 451: 93–105. <https://doi.org/10.3354/meps09560>
92. Maltagliati F, Lupi L, Castelli A, Pannacciulli FG. The genetic structure of the exotic ascidian *Styela plicata* (Tunicata) from Italian ports, with a re-appraisal of its worldwide genetic pattern. *Mar Ecol.* 2015; 37(3): 492–502. <https://doi.org/10.1111/maec.12261>
93. Pineda MC, Lorente B, López-Legentil S, Palacín C, Turon X. Stochasticity in space, persistence in time: genetic heterogeneity in harbour populations of the introduced ascidian *Styela plicata*. *PeerJ.* 2016; 4: e2158. <https://doi.org/10.7717/peerj.2158> PMID: 27366653
94. Voisin M, Engel CR, Viard F. Differential shuffling of native genetic diversity across introduced regions in a brown alga: aquaculture vs. maritime traffic effects. *P Natl Acad Sci Usa.* 2005; 102: 5432–5437. <https://doi.org/10.1073/pnas.0501754102> PMID: 15802466
95. Ricevuto E, Vizzini S, Gambi MC. Ocean acidification effects on stable isotope signatures and trophic interactions of polychaete consumers and organic matter sources at a CO<sub>2</sub> shallow vent system. *J Exp Mar Biol Ecol.* 2015; 468: 105–117. <https://doi.org/10.1016/j.jembe.2015.03.016>
96. Calosi P, Rastrick SPS, Lombardi C, de Guzman HJ, Davidson L, Jahnke M, et al. Adaptation and acclimatization to ocean acidification in marine ectotherms: an in situ transplant experiment with polychaetes at a shallow CO<sub>2</sub> vent system. *Phil Trans R Soc Lond B Biol Sci.* 2013; 368: 20120444.
97. Lucey NM, Lombardi C, De Marchi L, Schulze A, Gambi MC, Calosi P. To brood or not to brood: are marine organisms that protect their offspring more resilient to ocean acidification? *Sci Rep.* 2015; 5: 12009. <https://doi.org/10.1038/srep12009> PMID: 26156262
98. Patti FP, Gambi MC. Phylogeography of the invasive polychaete *Sabella spallanzanii* (Sabellidae) based on the nucleotide sequence of internal transcribed spacer 2 (ITS2) of nuclear rDNA. *Mar Ecol Prog Ser.* 2001; 215:169–177. <https://doi.org/10.3354/meps215169>
99. Monro CCA. On a collection of Polychaeta from Dry Tortugas, Florida. *Ann Mag Nat Hist London.* 1933; 10: 244–269. <http://dx.doi.org/10.1080/00222933308655413>.
100. Rioja E. Estudios Anelidológicos, 20. Observaciones acerca del *Dasychone bairdi* McIntosh (Poliqeto sabélido). *An Inst Biol UNAM Ser Zool.* 1951; 22: 513–516.
101. Rioja E. Estudios Anelidológicos, 22. Datos para el conocimiento de la fauna de anélidos poliquetos de las costas orientales de México. *An Inst Biol UNAM Ser Zool.* 1958; 29: 219–301.
102. Rioja E. Estudios Anelidológicos, 24. Adiciones a la fauna de anélidos poliquetos de las costas orientales de México. *An Inst Biol UNAM Ser Zool.* 1960; 31: 289–316.
103. Langerhans P. Die Wurmfauna von Madeira. IV. *Z Wiss Zool.* 1884; 40(2): 247–285.
104. Frankham R. Do island populations have less genetic variation than mainland populations? *Heredity.* 1997; 78:311–327. <https://doi.org/10.1038/hdy.1997.46> PMID: 9119706
105. Eldridge MD, King GM, Loupis AK, Spencer PBS, Taylor AC, Lisa CP, et al. Unprecedented low levels of genetic variation and inbreeding depression in an island population of the Black-Footed Rock-Wallaby. 1999; 13 (3): 531–541. <https://doi.org/10.1046/j.1523-1739.1999.98115.x>
106. Burdon JJ, Marshall DR. Biological control and the reproductive mode of weeds. *J Appl Ecol.* 1981; 18: 649–659. <https://doi.org/10.2307/2402423>
107. Sakai AK, Allendorf FW, Holt JS, Lodge DM, Molofsky J, With KA, et al. The population biology of invasive species. *Annu Rev Ecol Syst.* 2001; 32: 305–332. <https://doi.org/10.1146/annurev.ecolsys.32.081501.114037>.
108. Dupont L, Viard F, David P, Bishop JDD. Combined effects of bottlenecks and selfing in populations of *Corella eumyota*, a recently introduced sea squirt in the English Channel. *Divers Distrib.* 2007; 13: 808–817. <https://doi.org/10.1111/j.1472-4642.2007.00405.x>
109. Cognetti G, Maltagliati F. Port activities and international environmental control in the Mediterranean. *Mar Pollut Bull.* 2005; 50: 119–120. <https://doi.org/10.1016/j.marpolbul.2004.11.042> PMID: 15737354
110. Airoldi L, Beck MW. Loss, status and trends for coastal marine habitats of Europe. *Oceanogr Mar Biol Annu Rev.* 2007; 45: 345–405.
111. López-Legentil S, Legentil ML, Erwin PM, Turon X. Harbor networks as introduction gateways: contrasting distribution patterns of native and introduced ascidians. *Biol Invasions.* 2015; 17: 1623–1638. <https://doi.org/10.1007/s10530-014-0821-z> PMID: 26190935

112. Ruiz GM, Torchin ME, Grant K. Using the Panama Canal to test predictions about tropical marine invasions. In: Lang MA, Macintyre IG, Rutzler K, editors. Proceedings Smithsonian Marine Science Symposium, Smith Contributions to the Marine Sciences; 2009. pp. 291–299.
113. Hildebrand SF. The Panama Canal as a passageway for fishes, with lists and remarks on the fishes and invertebrates observed. *Zoologica*. 1939; 24(3): 15–45.
114. Rubinoff I. Mixing oceans and species. *Natural History*. 1965; 74(7): 69–72.
115. Rubinoff RW, Rubinoff I. Observations on the migration of a marine goby through the Panama Canal. *Copeia* 1969; 1969: 395–397. <http://dx.doi.org/10.2307/1442093>.
116. Cohen AN. Species introductions and the Panama Canal. In: Gollasch S, Galil BS, Cohen AN, editors. *Bridging Divides*. 2006. pp. 127–206. [http://dx.doi.org/10.1007/978-1-4020-5047-3\\_5](http://dx.doi.org/10.1007/978-1-4020-5047-3_5).
117. Schlöder C, Canning-Clode J, Saltonstall K, Strong EE, Ruiz GM, Torchin M. The Pacific bivalve *Anomia peruviana* in the Atlantic: a recent invasion across the Panama Canal? *Aquatic Invasions*. 2013; 8(4): 443–448. <http://dx.doi.org/10.3391/ai.2013.8.4.08>.
